# Supplementary material for: Connection position-induced aggregation-diminished and aggregation-enhanced organic room temperature electrophosphorescence
Source: Royal Society of Chemistry journal article supplement (doi:10.1039/d4tc01841a), 2024-01-01
Supplement: d4tc01841a1.pdf [file d4tc01841a1.pdf]

## Supporting Information (SI)

# Connection Position Induced Aggregation-Diminished or Aggregation-Enhanced Organic Room Temperature Electrophosphorescence

Jiaxin Lou<sup>a#</sup>, Lulin Xu<sup>a#</sup>, Wanting Ju<sup>a</sup>, Dong Wang<sup>a</sup>, Tianlin Cheng<sup>a</sup>, Weiguo Zhu<sup>b</sup>,  
Ning Su<sup>a,\*</sup>, Junqiao Ding<sup>a,\*</sup>

*<sup>a</sup>School of Chemical Science and Technology, Yunnan University, Kunming 650500,  
Yunnan, China*

*<sup>b</sup>Jiangsu Engineering Laboratory of Light-Electricity-Heat Energy-Converting  
Materials and Applications, School of Materials Science and Engineering, and  
Changzhou University, Changzhou 213164, China*

Corresponding author:

E-mail: [suning@ynu.edu.cn](mailto:suning@ynu.edu.cn)

E-mail: [dingjunqiao@ynu.edu.cn](mailto:dingjunqiao@ynu.edu.cn)

# Lou and Xu have the same contributions to this paper.

## 1. Methods

All reagents and chemicals were purchased from commercial sources and used without further purification.  $^1\text{H}$  and  $^{13}\text{C}$  nuclear magnetic resonance (NMR) spectra were performed on a Bruker Avance NMR spectrometer. Electrospray Ionization Mass Spectroscopy (ESI-MS) was measured on Agilent 1100 HPLC instrument. Elemental analyses were recorded by a Bio-Rad elemental analysis system. Thermal gravimetric analysis (TGA) was recorded on STA449F3 under nitrogen atmosphere at a heating rate of  $10\text{ }^\circ\text{C}/\text{min}$ , respectively. Cyclic voltammetry (CV) was measured on a CHI760E electrochemical analyzer using ferrocene/ferrocenium ( $\text{Fc}/\text{Fc}^+$ ) as the reference and  $n\text{-Bu}_4\text{NClO}_4$  (0.1 M) as the supporting electrolyte. The HOMO and LUMO energy levels were calculated by the equation:  $E_{\text{HOMO (or LUMO)}} = -[E_{\text{onset, ox (or } E_{\text{onset, red}}) + 4.8\text{V}]$ , where  $E_{\text{onset, ox}}$  is the onset value of the first oxidation wave and  $E_{\text{onset, red}}$  is the onset value of the first reduction wave. UV-Vis absorption spectra were measured with Shimadzu Corporation UV-3600i. The steady-state PL spectra, room-temperature phosphorescent spectra were measured on a HORIBA FLUOROMAX\_PLUS\_P spectrofluorometer equipped with an integrating sphere and a liquid nitrogen-cooled optical cryostat (Vcrto®V-100) with an Cryocon 22C temperature controller. Time-resolved emission spectra (TRES) were measured on a Omni- $\lambda$ 3028i fluorescence lifetime system equipped with a AO-S-355-40mW source. The transient PL spectra were recorded in vacuum using Edinburgh fluorescence spectrometer (FLS-1000). The PL quantum yields ( $\Phi_{\text{PLS}}$ ) were measured on Hamamatsu Photonics K. K.

## 2. Theoretical simulations

Density functional theory (DFT) and time-dependent DFT (TDDFT) calculations were performed using the Gaussian 09 program packages to calculate the frontier molecular orbital distributions, and energies of the key transitions. First, the geometries in the ground state were directly obtained from the 3D structure of D31 and D32. Second, the excited states ( $S_1$  and  $T_n$  below  $S_1$ ) energies, spin-orbit coupling matrix elements of  $S_1$ -to- $T_n$  and  $T_1$ -to- $S_0$  were calculated using TD-DFT at a B3LYP/6-31G(d) level

according to 3D structure. Third, hole and electron analysis were performed using Multiwfn program and visualized by VMD software.

### **3. Device fabrication and measurements**

The ITO substrates with a sheet resistance of 15  $\Omega$  per square were cleaned by sequential ultra-sonication in detergent, deionized water, acetone, ethanol, and then exposed to UV-Ozone for 15 min. After being transferred into a vacuum chamber, all material layers as shown in Fig. 6a were deposited by vacuum evaporation in a vacuum chamber with a base pressure of  $<3 \times 10^{-5}$  Pa. As for doped devices, mCP is doped into D31 or D32 at a varying doping concentration. Moreover, the sensitized devices of D32:S-Cz-BN (2.5 wt%) were also fabricated with the device structure of ITO/HATCN (3 nm)/TAPC (30 nm)/TCTA (5 nm)/mCP (5 nm)/EML/DPEPO (5 nm)/TmPyPB (40 nm)/Liq (1 nm)/Al (150 nm), in which the EML is composed with D32 and S-Cz-BN (2.5 wt%). Similar to the fabrication processes of doped and non-doped devices based on D31 and D32, HATCN, TAPC, TCTA, mCP, S-Cz-BN (2.5 wt%) doped in D32, DPEPO, TmPyPB, Liq and Al was evaporated on the ITO substrate, respectively. The current density-voltage characteristics were performed using an HP4140B picometer. And the luminance and electroluminescence (EL) spectra were recorded by Minolta LS-110 Luminance meter and Ocean Optics USB-4000 spectrometer, respectively. EQE was calculated from the EL spectrum, luminance and current density assuming a Lambertian emission distribution. All the measurements were carried out at room-temperature under ambient conditions without device encapsulation.

## **4. Experimental section**

### **4.1 Synthesis of D31**

DMAC-OH <sup>[1]</sup> (0.80 g, 2.65 mmol), Cs<sub>2</sub>CO<sub>3</sub> (1.13 g, 3.46 mmol), 3 mL dry NMP and 3 mL dry toluene were added into a 50 mL three-necked round-bottom flask, and then the suspension was heated to 140°C for 2 h under argon atmosphere. Afterwards, 3-fluorobenzophenone (0.46 g, 2.31 mmol) dissolved in 3 mL dry NMP was added to the

system. The mixture was heated to 160°C and refluxed for overnight. After cooling to room temperature, the system was extracted with dichloromethane (100 mL), washed with distilled water (150 mL), dried with anhydrous magnesium sulfate, filtered and distilled to obtain the crude product. Subsequently, the crude product was further purified by silica gel column chromatography using petroleum ether/dichloromethane (v/v = 6:1) as the eluent to afford D31 as a white powder (0.50 g, 45%). <sup>1</sup>H NMR (600 MHz, DMSO) δ 7.70 (dd, *J* = 13.8, 7.3 Hz, 4H), 7.67 - 7.63 (m, 1H), 7.59 - 7.55 (m, 1H), 7.53 - 7.49 (m, 3H), 7.47 (d, *J* = 7.8 Hz, 1H), 7.38 (d, *J* = 7.3 Hz, 3H), 7.31 (s, 1H), 7.24 (d, *J* = 8.1 Hz, 1H), 7.19 (s, 1H), 6.99 - 6.95 (m, 1H), 6.92 - 6.88 (m, 1H), 6.79 (dd, *J* = 8.9, 2.7 Hz, 1H), 6.16 (dd, *J* = 22.3, 8.5 Hz, 2H), 1.60 (s, 6H). <sup>13</sup>C NMR (151 MHz, DMSO) δ 195.57 (s), 158.86 (s), 149.21 (s), 141.01 (s), 140.74 (s), 138.99 (s), 137.99 (s), 137.25 (s), 133.25 (s), 131.93 (s), 131.69 (s), 131.39 (s), 130.68 (s), 130.05 (s), 129.27 (s), 129.03 (s), 127.03 (s), 125.86 (s), 124.10 (s), 121.49 (s), 121.06 (s), 118.86 (s), 118.05 (s), 117.27 (s), 115.32 (s), 113.99 (s), 40.42 (s), 40.21 (s), 40.28 (s), 40.14 (s), 40.00 (s), 39.86 (s), 39.58 (s), 39.72 (s), 39.58 (s), 36.33 (s), 31.44 (s). ESI (m/z): calcd for C<sub>34</sub>H<sub>27</sub>NO<sub>2</sub> [M+H]<sup>+</sup>482.2120, found 482.2117.

#### **4.2 Synthesis of D32**

The synthesis of D32 was similar to D31 with a good yield of 80%. <sup>1</sup>H NMR (600 MHz, DMSO) δ 7.75 (d, *J* = 8.4 Hz, 2H), 7.72 - 7.68 (m, 4H), 7.66 - 7.62 (m, 1H), 7.60 - 7.56 (m, 1H), 7.56 - 7.52 (m, 2H), 7.48 (d, *J* = 7.7 Hz, 1H), 7.40 (d, *J* = 7.7 Hz, 2H), 7.33 (d, *J* = 2.7 Hz, 1H), 7.02 (d, *J* = 8.4 Hz, 2H), 7.00 - 6.96 (m, 1H), 6.93 - 6.89 (m, 1H), 6.83 (dd, *J* = 8.9, 2.7 Hz, 1H), 6.22 (d, *J* = 8.9 Hz, 1H), 6.16 (d, *J* = 8.2 Hz, 1H), 1.62 (s, 6H). <sup>13</sup>C NMR (151 MHz, DMSO) δ 194.87 (s), 162.70 (s), 148.50 (s), 140.97 (s), 140.73 (s), 138.36 (s), 137.96 (s), 132.79 (s), 132.03 (s), 131.72 (s), 131.39 (s), 131.12 (s), 129.82 (s), 129.32 (s), 129.10 (s), 128.96 (s), 127.06 (s), 125.86 (s), 121.13 (s), 119.34 (s), 118.49 (s), 116.37 (s), 115.35 (s), 114.02 (s), 40.41 (s), 40.28 (s), 40.14 (s), 40.00 (s), 39.86 (s), 39.72 (m), 39.58 (s), 36.37 (s), 31.42 (s). ESI (m/z): calcd for C<sub>34</sub>H<sub>27</sub>NO<sub>2</sub> [M+H]<sup>+</sup>482.2120, found 482.2118.

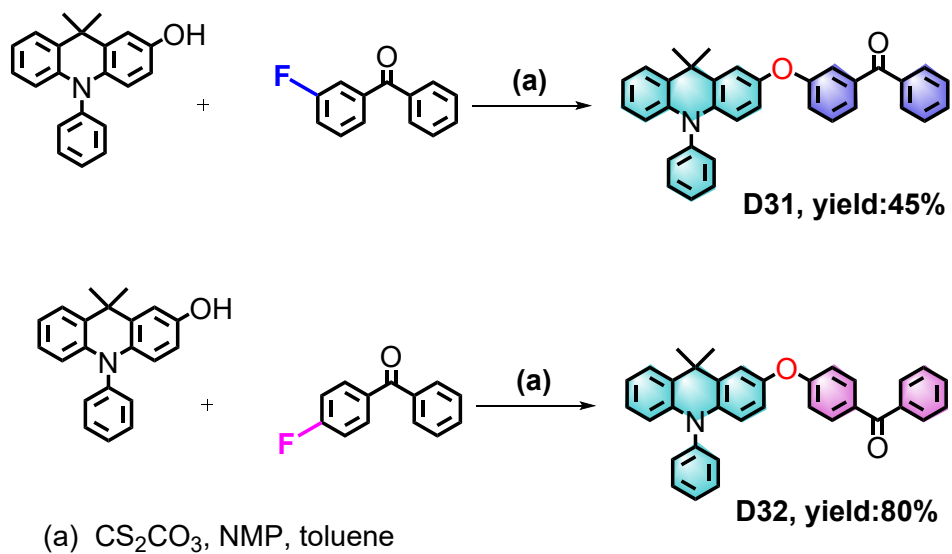

**Scheme 1.** The synthesis of D31 and D32.

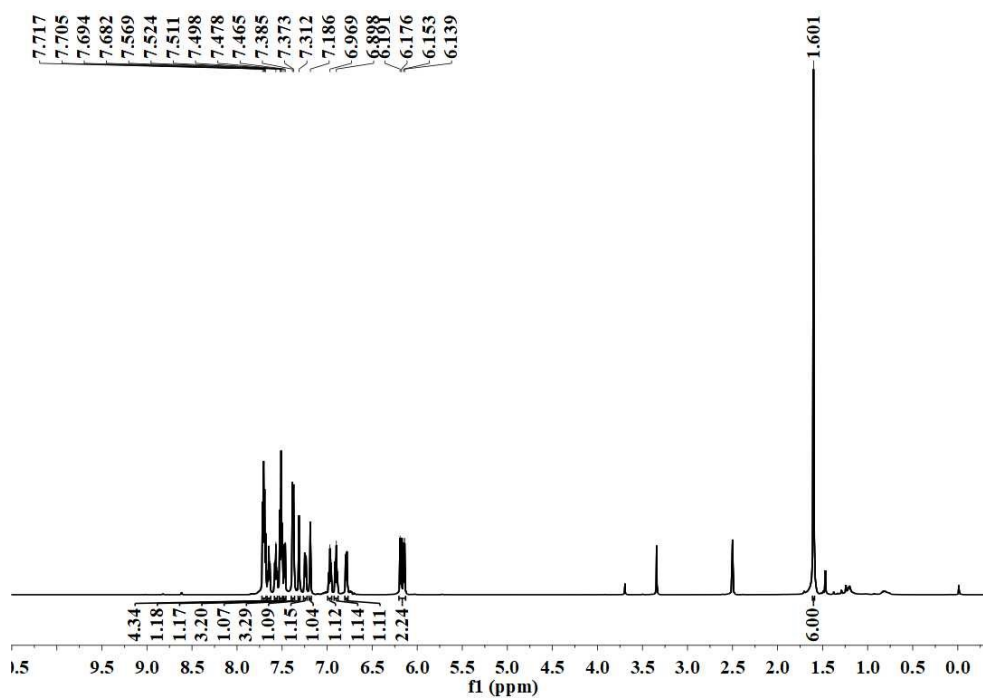

**Fig. S1.**  $^1\text{H}$  NMR of D31.

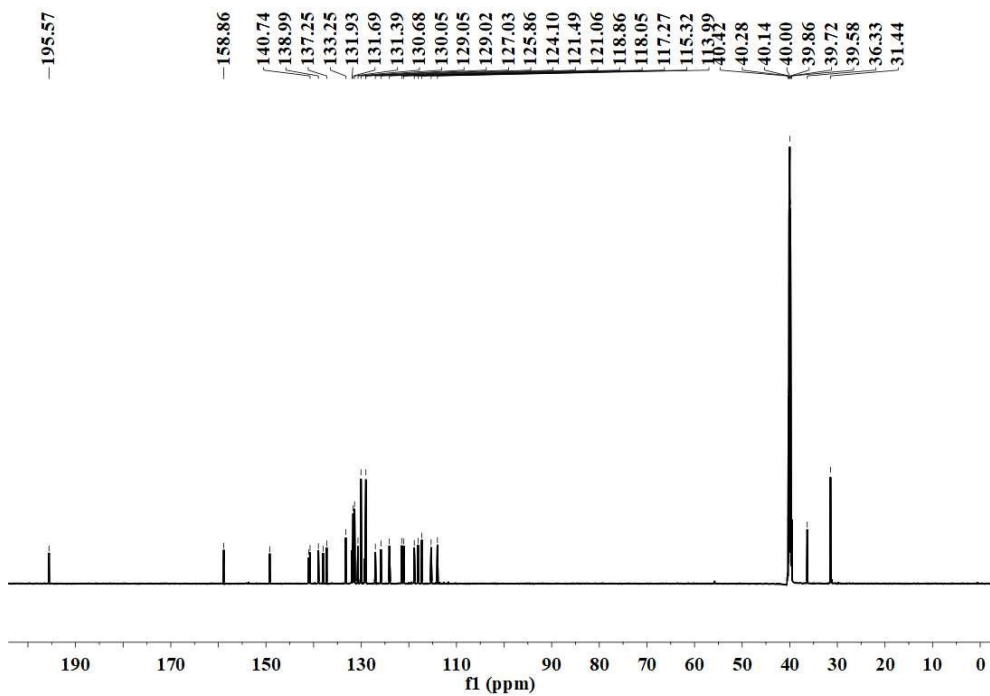

Fig. S2. <sup>13</sup>C NMR of D31.

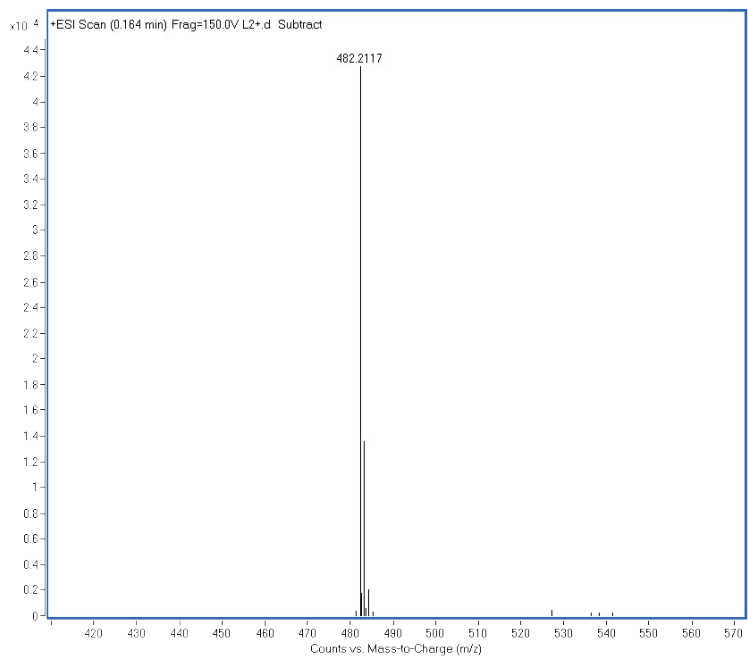

Fig. S3. Mass spectrum of D31.

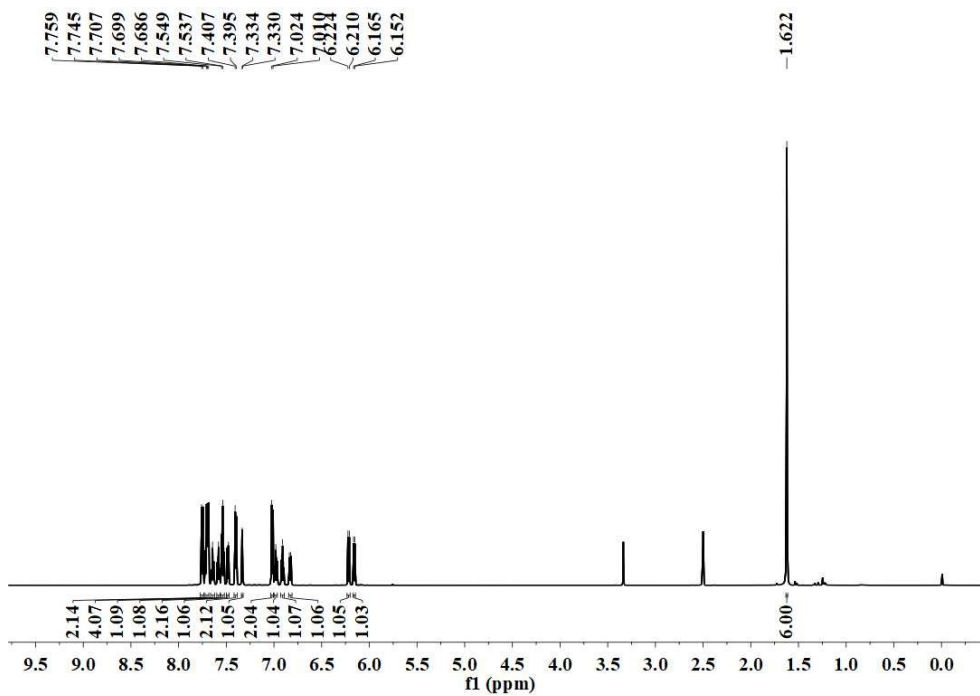

Fig. S4. <sup>1</sup>H NMR of D32.

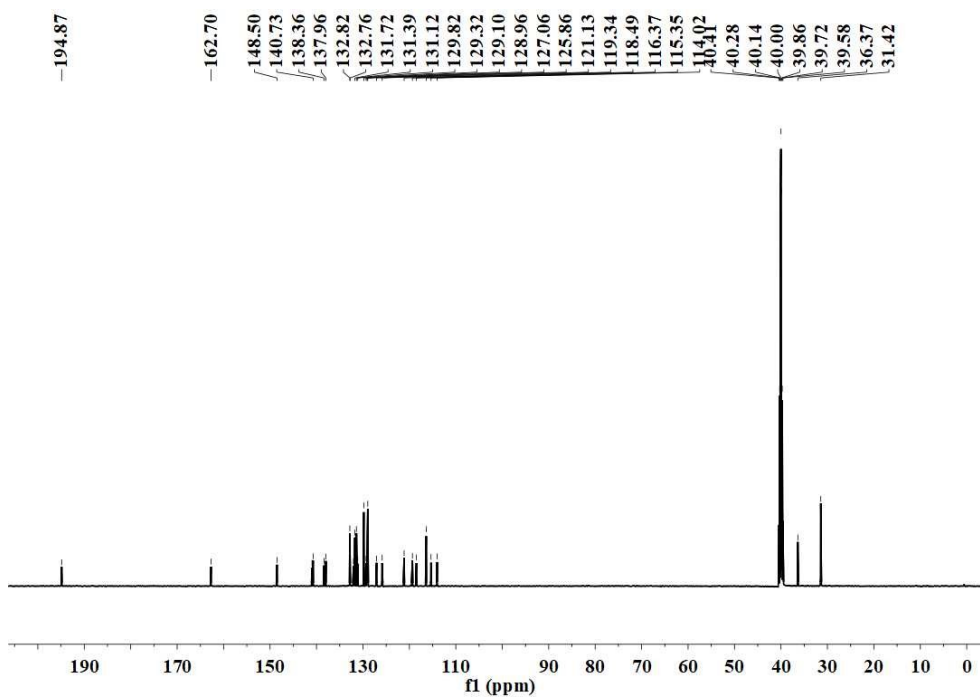

Fig. S5. <sup>13</sup>C NMR of D32.

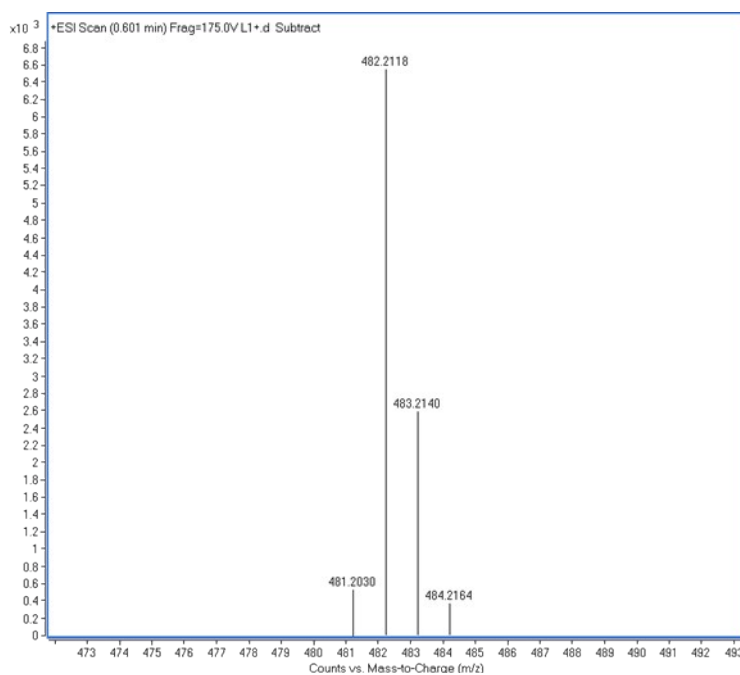

**Fig. S6.** Mass spectrum of D32.

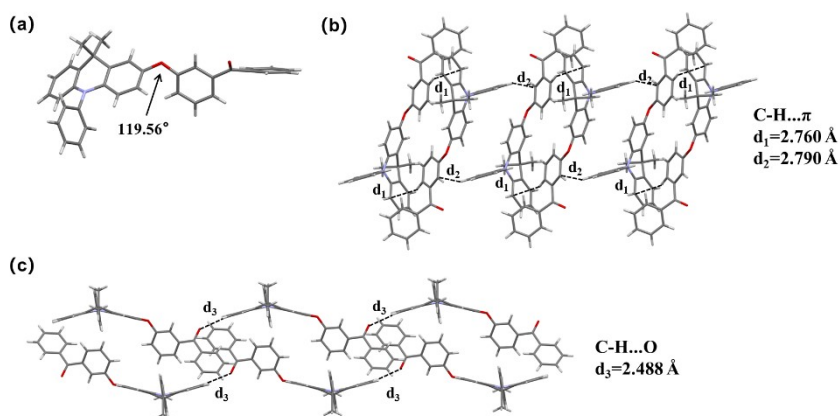

**Fig. S7.** (a) Single crystal structure and (b) packing pattern as well as intermolecular interactions of D31 (CCDC no. 2327606).

**Table S1.** X-Crystal data and structure refinement for D31 and D32.

|                   | D31                                             | D32                                             |
|-------------------|-------------------------------------------------|-------------------------------------------------|
| Empirical formula | C <sub>34</sub> H <sub>27</sub> NO <sub>2</sub> | C <sub>34</sub> H <sub>27</sub> NO <sub>2</sub> |
| Formula weight    | 481.56                                          | 481.56                                          |
| Temperature/K     | 100 K                                           | 150 K                                           |
| Crystal system    | Triclinic                                       | Monoclinic                                      |
| Space group       | P-1                                             | P21/n                                           |



|                                             |                                    |                                    |
|---------------------------------------------|------------------------------------|------------------------------------|
| a/Å                                         | 8.1013(7)                          | 10.7009(7)                         |
| b/Å                                         | 10.7557(11)                        | 20.1981(15)                        |
| c/Å                                         | 14.6429(15)                        | 11.7864(9)                         |
| $\alpha$ /°                                 | 92.302(5)°                         | 90                                 |
| $\beta$ /°                                  | 93.992(4)°                         | 94.071(3)°                         |
| $\gamma$ /°                                 | 92.948(4)°                         | 90                                 |
| Volume/Å <sup>3</sup>                       | 1269.9(2)                          | 2541.1(3)                          |
| Z                                           | 2                                  | 4                                  |
| P <sub>calc</sub> g/cm <sup>3</sup>         | 1.259                              | 1.259                              |
| Absorption coefficient/mm                   | 0.078                              | 0.078                              |
| F(000)                                      | 508                                | 1016                               |
| Crystal size/mm <sup>3</sup>                | 0.160 x 0.200 x 0.260              | 0.280 x 0.310 x 0.400              |
| Radiation                                   | MoK $\alpha$ (0.71073 Å)           | MoK $\alpha$ (0.71073 Å)           |
| Theta range for data collection/°           | 2.31 to 28.37                      | 2.00 to 28.38                      |
| Index ranges                                | -10<=h<=10, -14<=k<=14, -19<=l<=19 | -14<=h<=13, -26<=k<=26, -15<=l<=15 |
| Reflections collected                       | 41014                              | 42199                              |
| Independent reflections                     | 6344 [R(int) = 0.1002]             | 6343 [R(int) = 0.0525]             |
| Data/restraints/parameters                  | 6344 / 0 / 336                     | 6343 / 0 / 336                     |
| Goodness-of-fit on F <sup>2</sup>           | 1.041                              | 1.034                              |
| Final R indexes [I>=2 $\sigma$ (I)]         | R1 = 0.0494, wR2 = 0.1137          | R1 = 0.0437, wR2 = 0.1032          |
| Final R indexes [all data]                  | R1 = 0.0886, wR2 = 0.1366          | R1 = 0.0713, wR2 = 0.1267          |
| Largest diff. peak/hole / e Å <sup>-3</sup> | 0.245 and -0.251                   | 0.220 and -0.220                   |

**Table S2.** The bond length of D31.

| D31    | bond length (Å) | D31    | bond length (Å) |
|--------|-----------------|--------|-----------------|
| O1-C20 | 1.396(2)        | O1-C22 | 1.3773(19)      |
| O2-C28 | 1.219(2)        | N1-C1  | 1.4153(19)      |
| N1-C11 | 1.410(2)        | N1-C12 | 1.436(2)        |
| C1-C2  | 1.397(2)        | C1-C6  | 1.404(2)        |
| C2-H2  | 0.95            | C2-C3  | 1.389(2)        |

|         |          |         |          |
|---------|----------|---------|----------|
| C3-H3   | 0.95     | C3-C4   | 1.386(2) |
| C4-H4   | 0.95     | C4-C5   | 1.388(2) |
| C5-H5   | 0.95     | C5-C6   | 1.395(2) |
| C6-C7   | 1.520(2) | C7-C8   | 1.524(2) |
| C7-C9   | 1.550(2) | C7-C10  | 1.523(2) |
| C8-H8A  | 0.98     | C8-H8B  | 0.98     |
| C8-H8C  | 0.98     | C9-H9A  | 0.98     |
| C9-H9B  | 0.98     | C9-H9C  | 0.98     |
| C10-C11 | 1.405(2) | C10-C21 | 1.389(2) |
| C11-C18 | 1.398(2) | C12-C13 | 1.394(2) |
| C12-C17 | 1.382(2) | C13-H13 | 0.95     |
| C13-C14 | 1.390(2) | C14-H14 | 0.95     |
| C14-C15 | 1.382(3) | C15-H15 | 0.95     |
| C15-C16 | 1.387(2) | C16-H16 | 0.95     |
| C16-C17 | 1.389(2) | C17-H17 | 0.95     |
| C18-H18 | 0.95     | C18-C19 | 1.385(2) |
| C19-H19 | 0.95     | C19-C20 | 1.382(2) |
| C20-C21 | 1.380(2) | C21-H21 | 0.95     |
| C22-C23 | 1.385(2) | C22-C27 | 1.388(2) |
| C23-H23 | 0.95     | C23-C24 | 1.389(2) |
| C24-C25 | 1.392(2) | C24-C28 | 1.499(2) |
| C25-H25 | 0.95     | C25-C26 | 1.389(2) |
| C26-H26 | 0.95     | C26-C27 | 1.388(2) |
| C27-H27 | 0.95     | C28-C29 | 1.486(2) |
| C29-C30 | 1.391(3) | C29-C34 | 1.399(3) |
| C30-H30 | 0.95     | C30-C31 | 1.387(3) |
| C31-H31 | 0.95     | C31-C32 | 1.394(3) |
| C32-H32 | 0.95     | C32-C33 | 1.380(3) |
| C33-H33 | 0.95     | C33-C34 | 1.372(3) |

**Table S3.** The bond angle of D31.

| D31         | bond angle (° ) | D31         | bond angle (° ) |
|-------------|-----------------|-------------|-----------------|
| C22-O1-C20  | 119.57(12)      | C1-N1-C12   | 117.70(13)      |
| C11-N1-C1   | 118.90(13)      | C11-N1-C12  | 119.71(12)      |
| C2-C1-N1    | 121.31(14)      | C2-C1-C6    | 119.92(14)      |
| C6-C1-N1    | 118.75(14)      | C1-C2-H2    | 119.8           |
| C3-C2-C1    | 120.47(15)      | C3-C2-H2    | 119.8           |
| C2-C3-H3    | 120.0           | C4-C3-C2    | 120.03(15)      |
| C4-C3-H3    | 120.0           | C3-C4-H4    | 120.3           |
| C3-C4-C5    | 119.41(15)      | C5-C4-H4    | 120.3           |
| C4-C5-H5    | 119.1           | C4-C5-C6    | 121.73(15)      |
| C6-C5-H5    | 119.1           | C1-C6-C7    | 118.03(13)      |
| C5-C6-C1    | 118.24(14)      | C5-C6-C7    | 123.51(14)      |
| C6-C7-C8    | 112.80(13)      | C6-C7-C9    | 107.39(13)      |
| C6-C7-C10   | 108.06(12)      | C8-C7-C9    | 108.41(13)      |
| C10-C7-C8   | 112.83(13)      | C10-C7-C9   | 107.05(12)      |
| C7-C8-H8A   | 109.5           | C7-C8-H8B   | 109.5           |
| C7-C8-H8C   | 109.5           | H8A-C8-H8B  | 109.5           |
| H8A-C8-H8C  | 109.5           | H8B-C8-H8C  | 109.5           |
| C7-C9-H9A   | 109.5           | C7-C9-H9B   | 109.5           |
| C7-C9-H9C   | 109.5           | H9A-C9-H9B  | 109.5           |
| H9A-C9-H9C  | 109.5           | H9B-C9-H9C  | 109.5           |
| C11-C10-C7  | 118.17(14)      | C21-C10-C7  | 123.14(14)      |
| C21-C10-C11 | 118.43(14)      | C10-C11-N1  | 118.80(13)      |
| C18-C11-N1  | 121.54(14)      | C18-C11-C10 | 119.64(14)      |
| C13-C12-N1  | 120.91(14)      | C17-C12-N1  | 118.96(14)      |
| C17-C12-C13 | 120.09(15)      | C12-C13-H13 | 120.2           |
| C14-C13-C12 | 119.57(16)      | C14-C13-H13 | 120.2           |

|             |            |             |            |
|-------------|------------|-------------|------------|
| C13-C14-H14 | 119.9      | C15-C14-C13 | 120.18(16) |
| C15-C14-H14 | 119.9      | C14-C15-H15 | 119.9      |
| C14-C15-C16 | 120.23(16) | C16-C15-H15 | 119.9      |
| C15-C16-H16 | 120.1      | C15-C16-C17 | 119.76(16) |
| C17-C16-H16 | 120.1      | C12-C17-C16 | 120.17(15) |
| C12-C17-H17 | 119.9      | C16-C17-H17 | 119.9      |
| C11-C18-H18 | 119.6      | C19-C18-C11 | 120.85(15) |
| C19-C18-H18 | 119.6      | C18-C19-H19 | 120.5      |
| C20-C19-C18 | 119.04(14) | C20-C19-H19 | 120.5      |
| C19-C20-O1  | 122.00(14) | C21-C20-O1  | 117.01(14) |
| C21-C20-C19 | 120.71(15) | C10-C21-H21 | 119.4      |
| C20-C21-C10 | 121.13(15) | C20-C21-H21 | 119.4      |
| O1-C22-C23  | 115.22(14) | O1-C22-C27  | 124.09(15) |
| C23-C22-C27 | 120.66(15) | C22-C23-H23 | 120.2      |
| C22-C23-C24 | 119.69(15) | C24-C23-H23 | 120.2      |
| C23-C24-C25 | 120.23(15) | C23-C24-C28 | 117.46(14) |
| C25-C24-C28 | 122.08(15) | C24-C25-H25 | 120.3      |
| C26-C25-C24 | 119.44(15) | C26-C25-H25 | 120.3      |
| C25-C26-H26 | 119.7      | C27-C26-C25 | 120.64(15) |
| C27-C26-H26 | 119.7      | C22-C27-C26 | 119.33(15) |
| C22-C27-H27 | 120.3      | C26-C27-H27 | 120.3      |
| O2-C28-C24  | 119.50(16) | O2-C28-C29  | 120.47(16) |
| C29-C28-C24 | 120.02(15) | C30-C29-C28 | 121.25(16) |
| C30-C29-C34 | 119.69(18) | C34-C29-C28 | 118.85(17) |
| C29-C30-H30 | 120.0      | C31-C30-C29 | 119.99(19) |
| C31-C30-H30 | 120.0      | C30-C31-H31 | 120.2      |
| C30-C31-C32 | 119.5(2)   | C32-C31-H31 | 120.2      |
| C31-C32-H32 | 119.8      | C33-C32-C31 | 120.4(2)   |
| C33-C32-H32 | 119.8      | C32-C33-H33 | 119.9      |

|             |          |             |       |
|-------------|----------|-------------|-------|
| C34-C33-C32 | 120.3(2) | C34-C33-H33 | 119.9 |
| C33-C34-H34 | 119.9    |             |       |

**Table S4.** The bond length of D32.

| D32     | bond length (Å) | D32     | bond length (Å) |
|---------|-----------------|---------|-----------------|
| O2-C14  | 1.4046(17)      | O2-C11  | 1.3681(17)      |
| O1-C7   | 1.2248(17)      | N1-C29  | 1.4386(17)      |
| N1-C17  | 1.4052(18)      | N1-C24  | 1.4089(18)      |
| C32-H32 | 0.95            | C32-C33 | 1.383(3)        |
| C32-C31 | 1.389(3)        | C33-H33 | 0.95            |
| C33-C34 | 1.384(2)        | C34-H34 | 0.95            |
| C34-C29 | 1.387(2)        | C29-C30 | 1.386(2)        |
| C17-C16 | 1.3978(19)      | C17-C18 | 1.4056(19)      |
| C16-H16 | 0.95            | C16-C15 | 1.385(2)        |
| C15-H15 | 0.95            | C15-C14 | 1.380(2)        |
| C14-C19 | 1.379(2)        | C11-C10 | 1.395(2)        |
| C11-C12 | 1.390(2)        | C10-H10 | 0.95            |
| C10-C9  | 1.377(2)        | C9-H9   | 0.95            |
| C9-C8   | 1.395(2)        | C8-C7   | 1.482(2)        |
| C8-C13  | 1.4032(19)      | C7-C1   | 1.495(2)        |
| C1-C2   | 1.390(2)        | C1-C6   | 1.390(2)        |
| C2-H2   | 0.95            | C2-C3   | 1.392(3)        |
| C3-H3   | 0.95            | C3-C4   | 1.376(3)        |
| C4-H4   | 0.95            | C4-C5   | 1.380(3)        |
| C18-C19 | 1.393(2)        | C18-C20 | 1.5210(19)      |
| C19-H19 | 0.95            | C6-H6   | 0.95            |
| C6-C5   | 1.378(3)        | C5-H5   | 0.95            |
| C13-H13 | 0.95            | C13-C12 | 1.379(2)        |
| C12-H12 | 0.95            | C20-C22 | 1.532(2)        |
| C20-C23 | 1.524(2)        | C20-C21 | 1.550(2)        |

|          |          |          |            |
|----------|----------|----------|------------|
| C22-H22A | 0.98     | C22-H22B | 0.98       |
| C22-H22C | 0.98     | C23-C24  | 1.4080(19) |
| C23-C28  | 1.389(2) | C24-C25  | 1.399(2)   |
| C25-H25  | 0.95     | C25-C26  | 1.387(2)   |
| C26-H26  | 0.95     | C26-C27  | 1.382(2)   |
| C27-H27  | 0.95     | C27-C28  | 1.386(2)   |
| C28-H28  | 0.95     | C21-H21A | 0.98       |
| C21-H21B | 0.98     | C21-H21C | 0.98       |
| C30-H30  | 0.95     | C30-C31  | 1.383(2)   |
| C31-H31  | 0.95     |          |            |

**Table S4.** The bond angle of D32.

| D32         | bond angle (°) | D32         | bond angle (°) |
|-------------|----------------|-------------|----------------|
| C11-O2-C14  | 117.61(11)     | C17-N1-C29  | 118.23(11)     |
| C17-N1-C24  | 119.66(11)     | C24-N1-C29  | 119.45(11)     |
| C33-C32-H32 | 120.0          | C33-C32-C31 | 119.97(15)     |
| C31-C32-H32 | 120.0          | C32-C33-H33 | 119.9          |
| C32-C33-C34 | 120.20(16)     | C34-C33-H33 | 119.9          |
| C33-C34-H34 | 120.2          | C33-C34-C29 | 119.66(15)     |
| C29-C34-H34 | 120.2          | C34-C29-N1  | 118.74(13)     |
| C30-C29-N1  | 120.88(13)     | C30-C29-C34 | 120.37(14)     |
| N1-C17-C18  | 119.35(12)     | C16-C17-N1  | 120.75(12)     |
| C16-C17-C18 | 119.90(13)     | C17-C16-H16 | 119.6          |
| C15-C16-C17 | 120.81(13)     | C15-C16-H16 | 119.6          |
| C16-C15-H15 | 120.6          | C14-C15-C16 | 118.72(13)     |
| C14-C15-H15 | 120.6          | C15-C14-O2  | 119.93(13)     |
| C19-C14-O2  | 118.50(13)     | C19-C14-C15 | 121.52(13)     |
| O2-C11-C10  | 123.86(13)     | O2-C11-C12  | 115.55(12)     |
| C12-C11-C10 | 120.59(13)     | C11-C10-H10 | 120.4          |

|               |            |               |            |
|---------------|------------|---------------|------------|
| C9-C10-C11    | 119.23(13) | C9-C10-H10    | 120.4      |
| C10-C9-H9     | 119.3      | C10-C9-C8     | 121.34(13) |
| C8-C9-H9      | 119.3      | C9-C8-C7      | 118.72(13) |
| C9-C8-C13     | 118.37(13) | C13-C8-C7     | 122.73(13) |
| O1-C7-C8      | 120.52(14) | O1-C7-C1      | 119.51(14) |
| C8-C7-C1      | 119.94(12) | C2-C1-C7      | 122.28(14) |
| C2-C1-C6      | 119.52(15) | C6-C1-C7      | 118.18(14) |
| C1-C2-H2      | 120.2      | C1-C2-C3      | 119.63(17) |
| C3-C2-H2      | 120.2      | C2-C3-H3      | 120.0      |
| C4-C3-C2      | 120.05(18) | C4-C3-H3      | 120.0      |
| C3-C4-H4      | 119.8      | C3-C4-C5      | 120.43(17) |
| C5-C4-H4      | 119.8      | C17-C18-C20   | 119.29(12) |
| C19-C18-C17   | 118.50(13) | C19-C18-C20   | 121.95(12) |
| C14-C19-C18   | 120.50(13) | C14-C19-H19   | 119.8      |
| C18-C19-H19   | 119.8      | C1-C6-H6      | 119.8      |
| C5-C6-C1      | 120.38(17) | C5-C6-H6      | 119.8      |
| C4-C5-H5      | 120.0      | C6-C5-C4      | 119.91(19) |
| C6-C5-H5      | 120.0      | C8-C13-H13    | 119.5      |
| C12-C13-C8    | 120.94(13) | C12-C13-H13   | 119.5      |
| C11-C12-H12   | 120.2      | C13-C12-C11   | 119.51(13) |
| C13-C12-H12   | 120.2      | C18-C20-C22   | 111.67(12) |
| C18-C20-C23   | 109.06(11) | C18-C20-C21   | 107.16(12) |
| C22-C20-C21   | 108.46(12) | C23-C20-C22   | 112.50(12) |
| C23-C20-C21   | 107.78(12) | C20-C22-H22A  | 109.5      |
| C20-C22-H22B  | 109.5      | C20-C22-H22C  | 109.5      |
| H22A-C22-H22B | 109.5      | H22A-C22-H22C | 109.5      |
| H22B-C22-H22C | 109.5      | C24-C23-C20   | 119.46(12) |
| C28-C23-C20   | 122.76(13) | C28-C23-C24   | 117.48(13) |
| C23-C24-N1    | 118.83(12) | C25-C24-N1    | 120.84(13) |

|               |            |               |            |
|---------------|------------|---------------|------------|
| C25-C24-C23   | 120.32(13) | C24-C25-H25   | 119.9      |
| C26-C25-C24   | 120.29(14) | C26-C25-H25   | 119.9      |
| C25-C26-H26   | 120.0      | C27-C26-C25   | 120.00(15) |
| C27-C26-H26   | 120.0      | C26-C27-H27   | 120.3      |
| C26-C27-C28   | 119.42(14) | C28-C27-H27   | 120.3      |
| C23-C28-H28   | 118.8      | C27-C28-C23   | 122.40(14) |
| C27-C28-H28   | 118.8      | C20-C21-H21A  | 109.5      |
| C20-C21-H21B  | 109.5      | C20-C21-H21C  | 109.5      |
| H21A-C21-H21B | 109.5      | H21A-C21-H21C | 109.5      |
| H21B-C21-H21C | 109.5      | C29-C30-H30   | 120.1      |
| C31-C30-C29   | 119.76(15) | C31-C30-H30   | 120.1      |
| C32-C31-H31   | 120.0      | C30-C31-C32   | 120.03(16) |
| C30-C31-H31   | 120.0      |               |            |

---

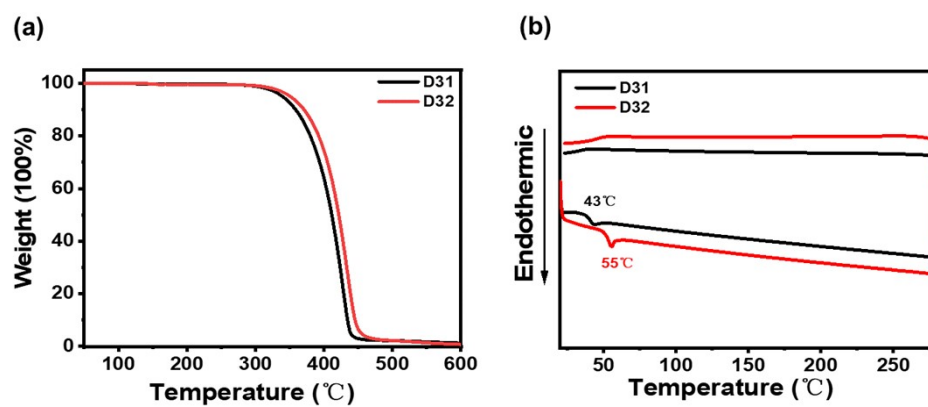

**Fig. S8.** TGA and DSC curves of D31 and D32.



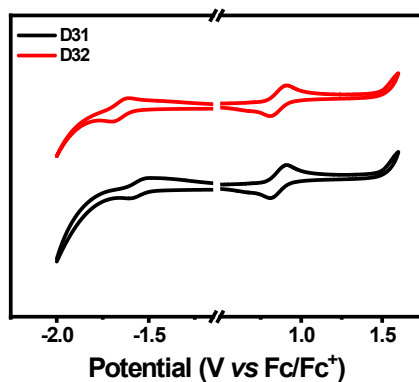

Fig. S9. CV curves of D31 and D32.

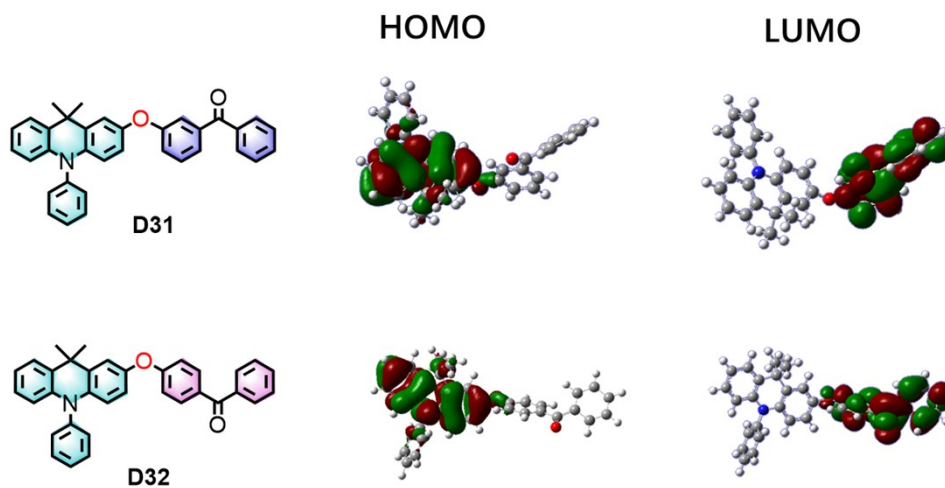

Fig. S10. Calculated HOMO and LUMO distributions of D31 and D32.

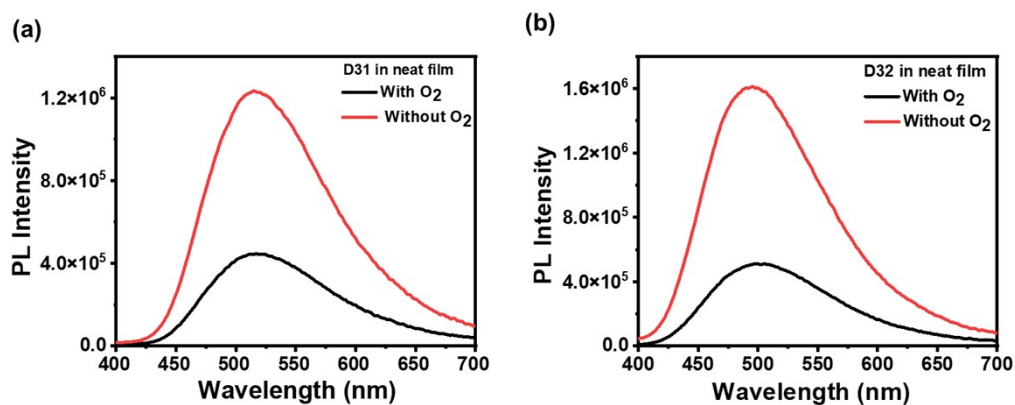

Fig. S11. The O<sub>2</sub> dependence of the PL spectra in neat film for D31 (a) and D32 (b).

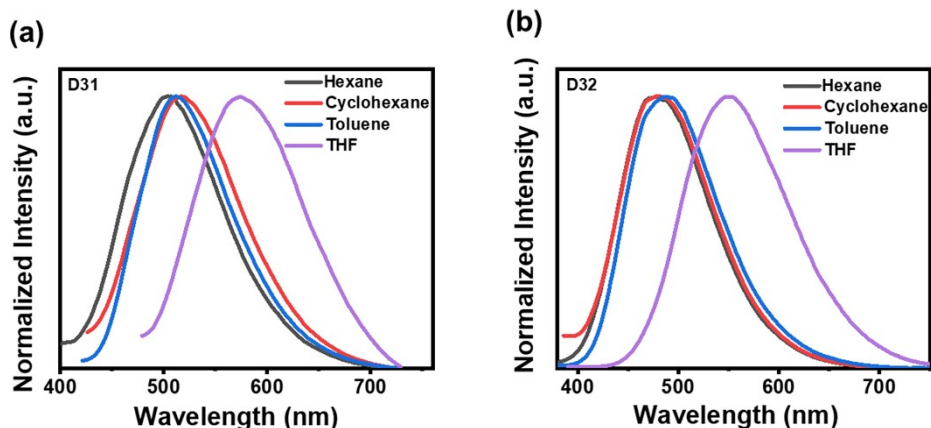

**Fig. S12.** PL spectra measured in different organic solvents in the presence of  $O_2$  for D31 (a) and D32 (b).

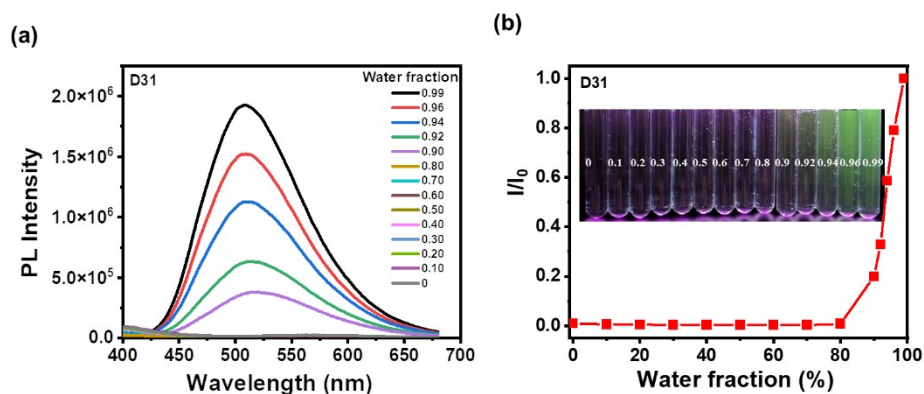

**Fig. S13.** AIE behavior of D31 in water/THF mixed solvents: (a) Dependence of the PL spectra excited at 350 nm on the water fraction; (b) Relative emission intensity as a function of water fraction, in which  $I$  and  $I_0$  represent the PL intensity in water/THF mixed solvents and pure THF solution, respectively. Insets: PL images under UV light with the increasing water fraction from left to right.

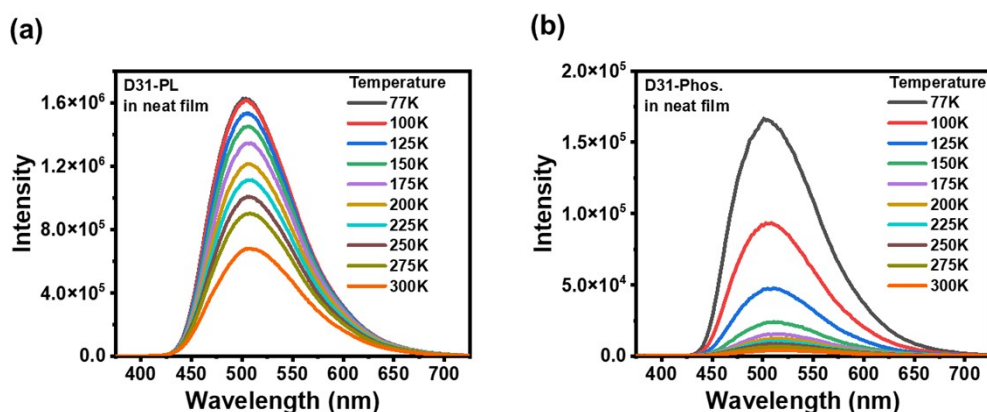

**Fig. S14.** (a) Temperature-dependent PL spectra (without a delay) for D31 film; (b) Temperature-dependent phosphorescence spectra (with a 0.1 ms delay) for D31 film.

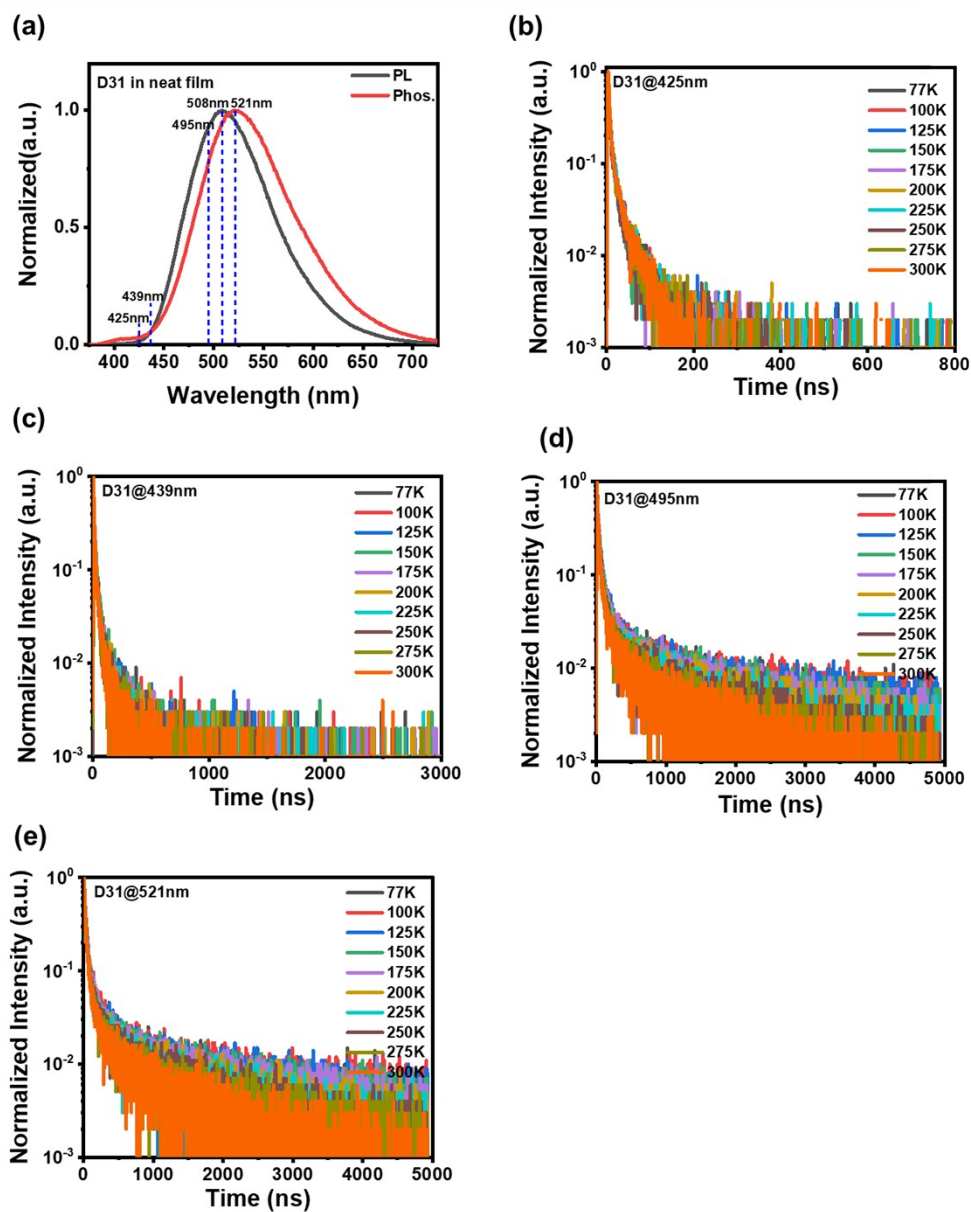

**Fig. S15.** PL and RTP spectrum (a), Time-dependent transient PL spectra detected at a wavelength of 425 nm (b), 439 nm (c), 495 nm (d) and 521 nm (e) for D31 in neat film.

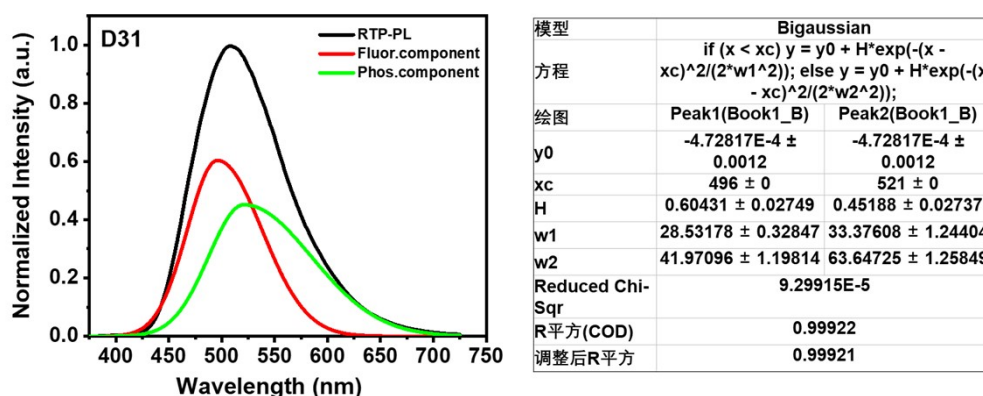

**Fig. S16.** Bigaussian fitting of the steady-state PL spectra for D31 film. Given that fluorescence is dominated in the TRES spectra at the begging, the peak of TRES spectrum at 1 ns (496 nm) is set as the maximum fluorescent emission. Combined with the maximum phosphorescent emission (521 nm) shown in the RTP spectrum, a Bigaussian fitting is performed to divide the fluorescence and RTP. By comparing their corresponding integral area, the populations of fluorescence and RTP are calculated to be 49.3% and 50.7%, respectively.

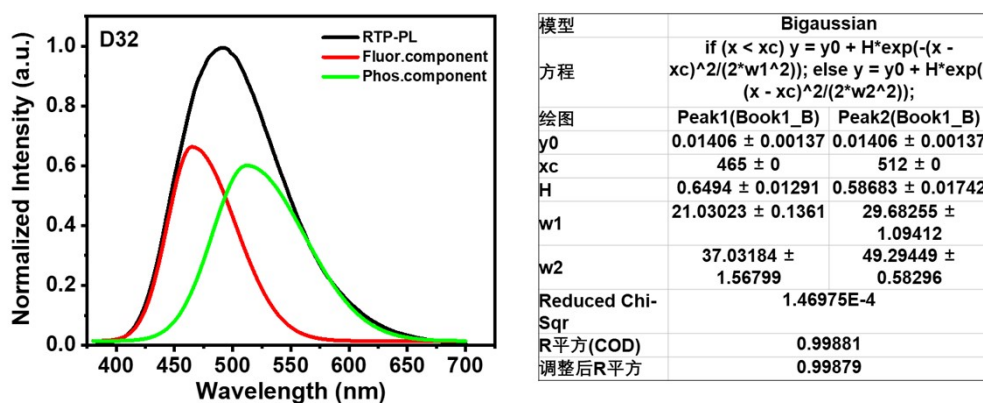

**Fig. S17.** Bigaussian fitting of the steady-state PL spectra for D32 film. Given that fluorescence is dominated in the TRES spectra at the begging, the peak of TRES spectrum at 1 ns (465 nm) is set as the maximum fluorescent emission. Combined with the maximum phosphorescent emission (512 nm) shown in the RTP spectrum, a Bigaussian fitting is performed to divide the fluorescence and RTP. By comparing their corresponding integral area, the populations of fluorescence and RTP are calculated to be 43% and 57%, respectively.

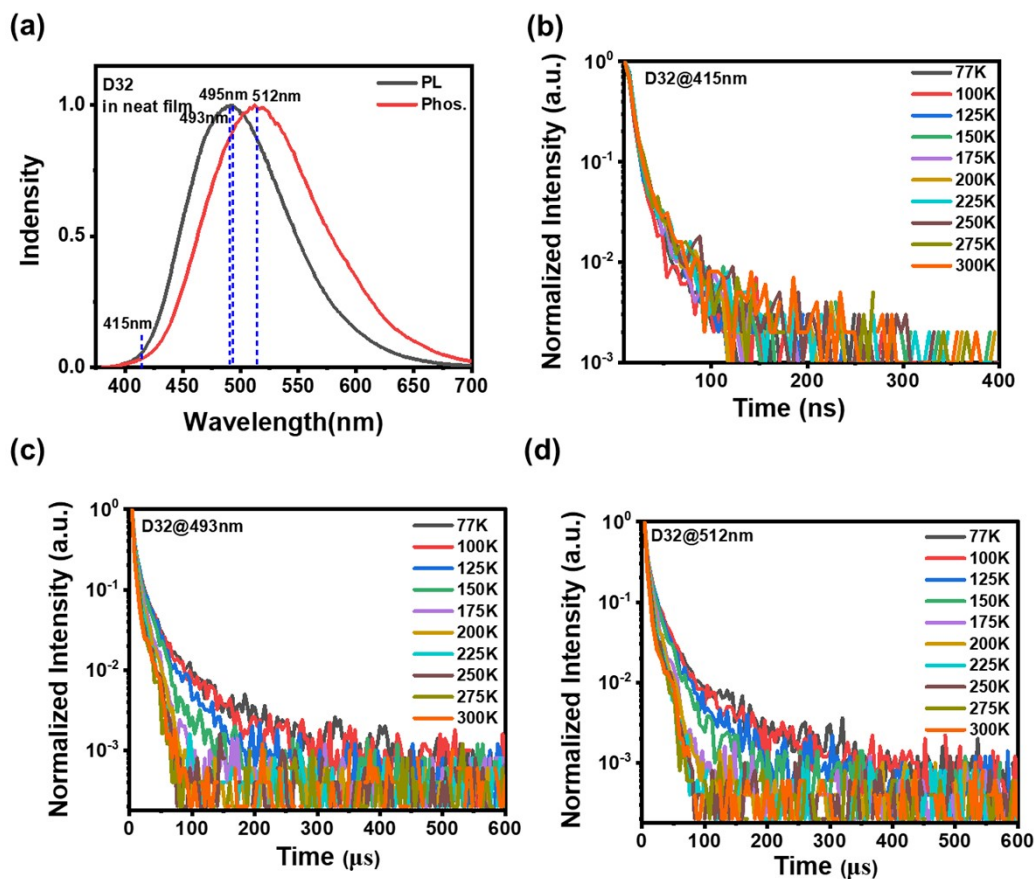

**Fig. S18.** PL and RTP spectrum (a), Time-dependent transient PL spectra detected at a wavelength of 415 nm (a), 493 nm (b), and 512 nm (c) for D32 in neat film.

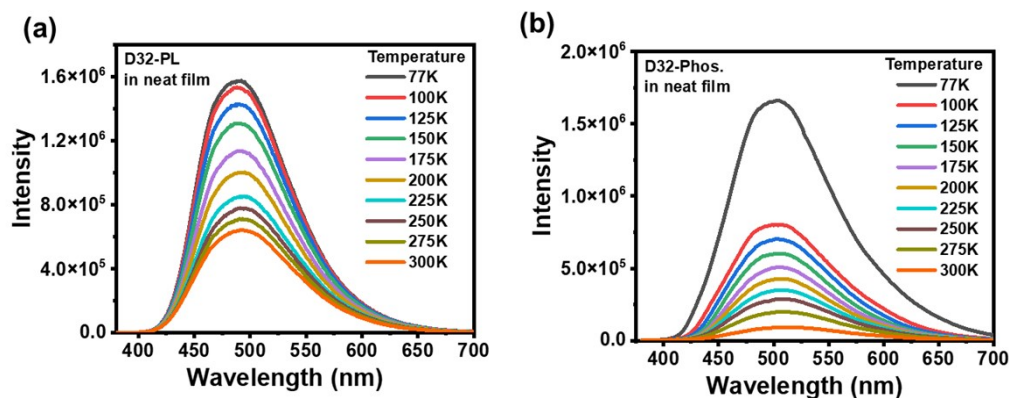

**Fig. S19.** (a) Temperature-dependent PL spectra (without a delay) for D32 film; (b) Temperature-dependent phosphorescence spectra (with a 0.1 ms delay) for D32 film.



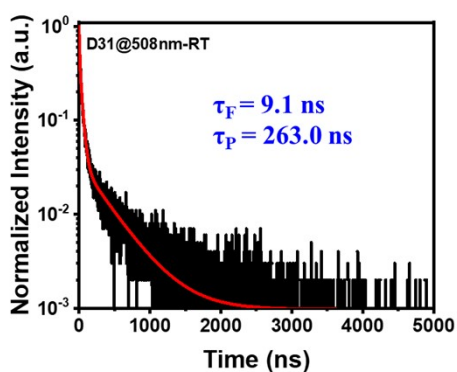

| Model           | ExpDecay3                                                                                        |
|-----------------|--------------------------------------------------------------------------------------------------|
| Equation        | $y = y_0 + A1 \cdot \exp(-(x-x_0)/t1) + A2 \cdot \exp(-(x-x_0)/t2) + A3 \cdot \exp(-(x-x_0)/t3)$ |
| Plot            | Normalized1                                                                                      |
| y0              | $9.68636E-4 \pm 5.206E-5$                                                                        |
| x0              | $-1.04845E-11 \pm 0$                                                                             |
| A1              | $0.51718 \pm 0.00713$                                                                            |
| t1              | $9.06047 \pm 0.14071$                                                                            |
| A2              | $0.43947 \pm 0.00718$                                                                            |
| t2              | $35.97039 \pm 0.46019$                                                                           |
| A3              | $0.03532 \pm 7.49065E-4$                                                                         |
| t3              | $387.48878 \pm 8.23324$                                                                          |
| Reduced Chi-Sqr | $7.10772E-6$                                                                                     |
| R-Square (COD)  | 1                                                                                                |
| Adj. R-Square   | 1                                                                                                |

Fig. S20. Transient PL spectra in neat films for D31 at RT.

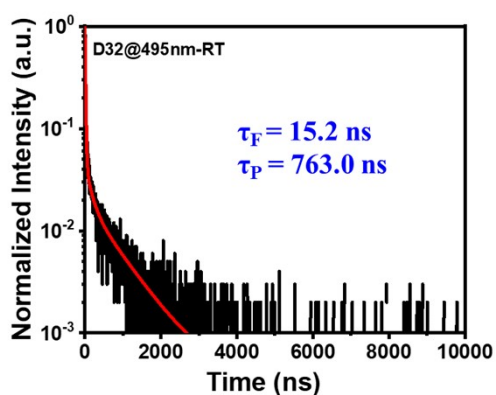

| Model           | ExpDec3                                                                        |
|-----------------|--------------------------------------------------------------------------------|
| Equation        | $y = A1 \cdot \exp(-x/t1) + A2 \cdot \exp(-x/t2) + A3 \cdot \exp(-x/t3) + y_0$ |
| Plot            | Normalized1                                                                    |
| y0              | $4.81579E-4 \pm 4.86286E-5$                                                    |
| A1              | $0.36834 \pm --$                                                               |
| t1              | $15.67428 \pm 36329.49331$                                                     |
| A2              | $0.6709 \pm --$                                                                |
| t2              | $15.67437 \pm 19945.72176$                                                     |
| A3              | $0.03656 \pm 9.44305E-4$                                                       |
| t3              | $439.60122 \pm 13.36533$                                                       |
| Reduced Chi-Sqr | $8.70804E-6$                                                                   |
| R-Square (COD)  | 0.98686                                                                        |
| Adj. R-Square   | 0.98685                                                                        |

Fig. S21. Transient PL spectra in neat films for D32 at RT.

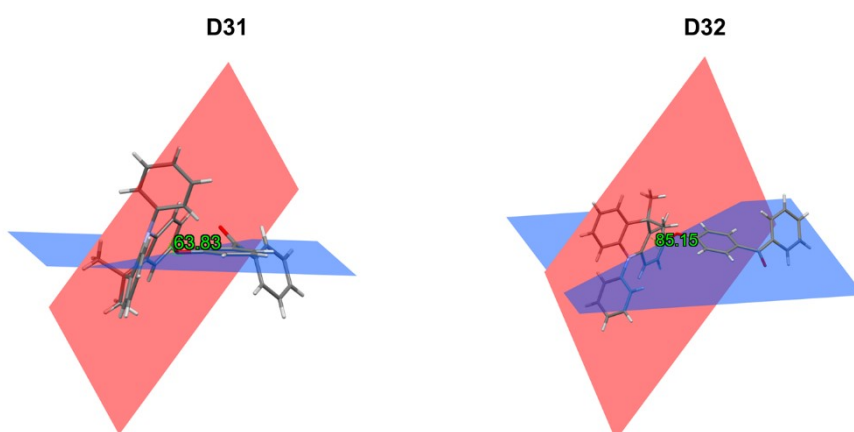

Fig. S22. Dihedral angle between the donor and the acceptor for D31 and D32.

Table S6. Photophysical properties and related parameters of D31 and D32.

| Emitter       | D31 | D32  |
|---------------|-----|------|
| $\tau_F$ (ns) | 9.1 | 15.2 |

|                                                    |       |       |
|----------------------------------------------------|-------|-------|
| F population (%)                                   | 49.3  | 43.0  |
| $\tau_p$ (ns)                                      | 263.0 | 763.0 |
| RTP population (%) <sup>a</sup>                    | 50.7  | 57.0  |
| $\Phi_{F(\%)}$ <sup>b</sup>                        | 8.5   | 12.5  |
| $\Phi_{P(\%)}$ <sup>b</sup>                        | 8.8   | 16.7  |
| $\Phi_{PL(\%)}$ <sup>b</sup>                       | 17.3  | 29.2  |
| $k_r^F$ ( $10^7$ S <sup>-1</sup> ) <sup>c</sup>    | 0.93  | 0.82  |
| $k_{nr}^F$ ( $10^7$ S <sup>-1</sup> ) <sup>c</sup> | 9.09  | 4.66  |
| $k_r^P$ ( $10^6$ S <sup>-1</sup> ) <sup>c</sup>    | 0.33  | 0.22  |
| $k_{nr}^P$ ( $10^7$ S <sup>-1</sup> ) <sup>c</sup> | 0.35  | 0.11  |
| $k_{ISC}$ ( $10^7$ S <sup>-1</sup> ) <sup>c</sup>  | 0.97  | 1.10  |

<sup>a</sup>Fluorescence (F) and room-temperature phosphorescence (RTP) populations were estimated from Bigaussian fitting of the PL spectra; <sup>b</sup>The PLQYs of fluorescence ( $\Phi_F$ ) and RTP ( $\Phi_P$ ) were determined by the total PLQY ( $\Phi_{PL}$ ) and their corresponding populations; <sup>c</sup>The fluorescence radiative rate ( $k_r^F$ ), fluorescence non-radiative rate ( $k_{nr}^F$ ), phosphorescence radiative rate ( $k_r^P$ ), phosphorescence non-radiative rate ( $k_{nr}^P$ ) and intersystem crossing rate ( $k_{ISC}$ ) were obtained by the following equations:  $k_r^F = \Phi_F / \tau_F$ ,  $k_{nr}^F = (1 - \Phi_F - \Phi_P) / \tau_F$ ,  $k_r^P = \Phi_P / \tau_P$ ,  $k_{nr}^P = (1 - \Phi_P) / \tau_P$ ,  $k_{ISC} = \Phi_P / \tau_F$

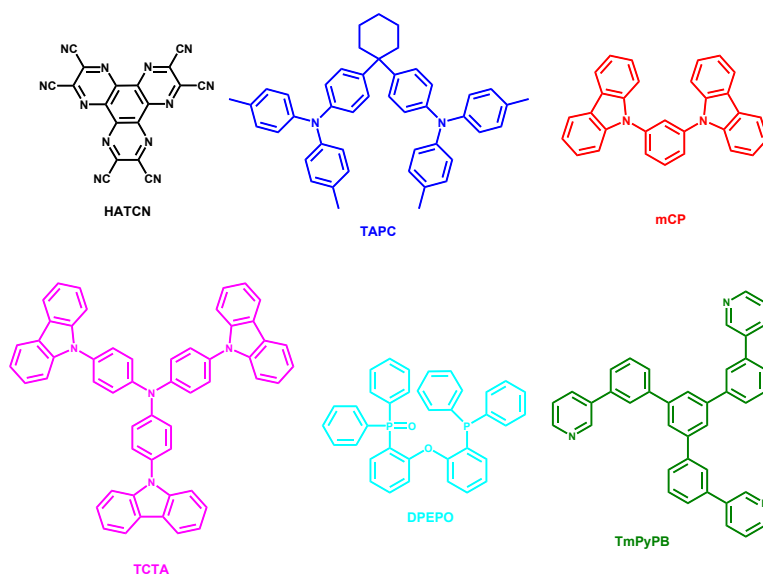

**Fig. S23.** The materials used in the device.

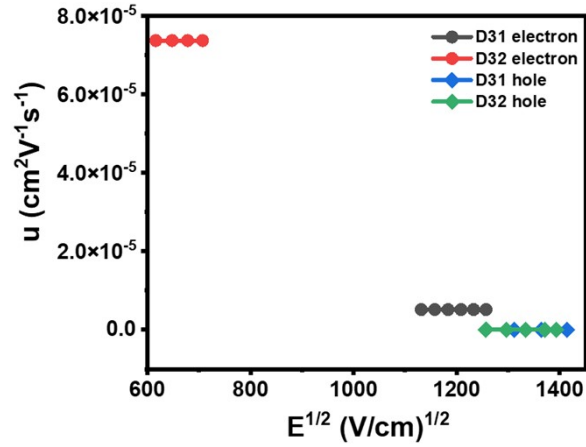

**Fig. S24.** The carrier transport properties of D31 and D32, in which the electron only device structure is ITO/LiF (1 nm)/D31 or D32 (100 nm)/LiF(1nm)/Al (100 nm), and the hole only device was fabricated with the structure of ITO/MoO<sub>3</sub>(2 nm)/D31 or D32 (100 nm)/MoO<sub>3</sub> (5 nm)/Al (100 nm).

**Table S7.** Summary of hole and electron mobilities of D31 and D32.

| Device Structure |     | $\epsilon_0$ (F/m)      | $\epsilon_r$ | L(nm) | $\mu$ (cm <sup>2</sup> V <sup>-1</sup> s <sup>-1</sup> ) |
|------------------|-----|-------------------------|--------------|-------|----------------------------------------------------------|
| EOD              | D31 | $8.854 \times 10^{-12}$ | 3            | 100   | $5.16 \times 10^{-6}$                                    |
|                  | D32 |                         |              | 100   | $7.37 \times 10^{-5}$                                    |
| HOD              | D31 |                         |              | 100   | $1.54 \times 10^{-8}$                                    |
|                  | D32 |                         |              | 100   | $1.49 \times 10^{-8}$                                    |

$\epsilon_0$  and  $\epsilon_r$  are the vacuum and relative dielectric permittivity; L is the thickness of the device;  $\mu$  is the carrier mobility.



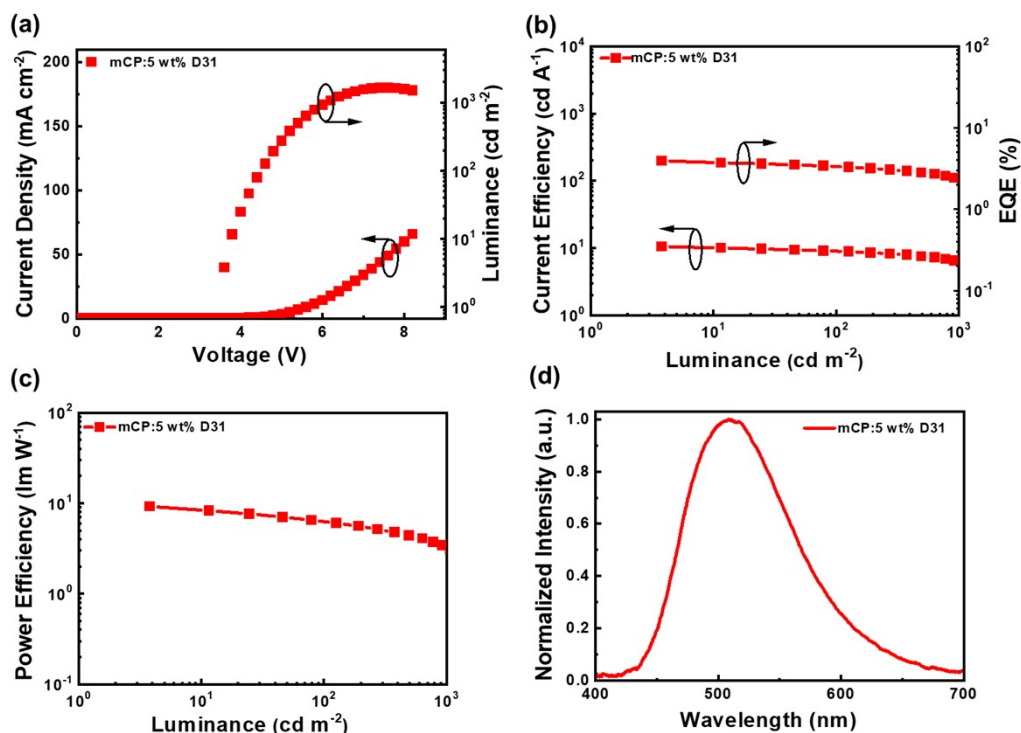

**Fig. S25.** Doped device performances of 5 wt% D31 in mCP: (a) Current density-luminance-voltage characteristics; (b) Current efficiency-luminance-EQE properties; (c) Power efficiency *versus* luminance curves; (d) EL spectrum.

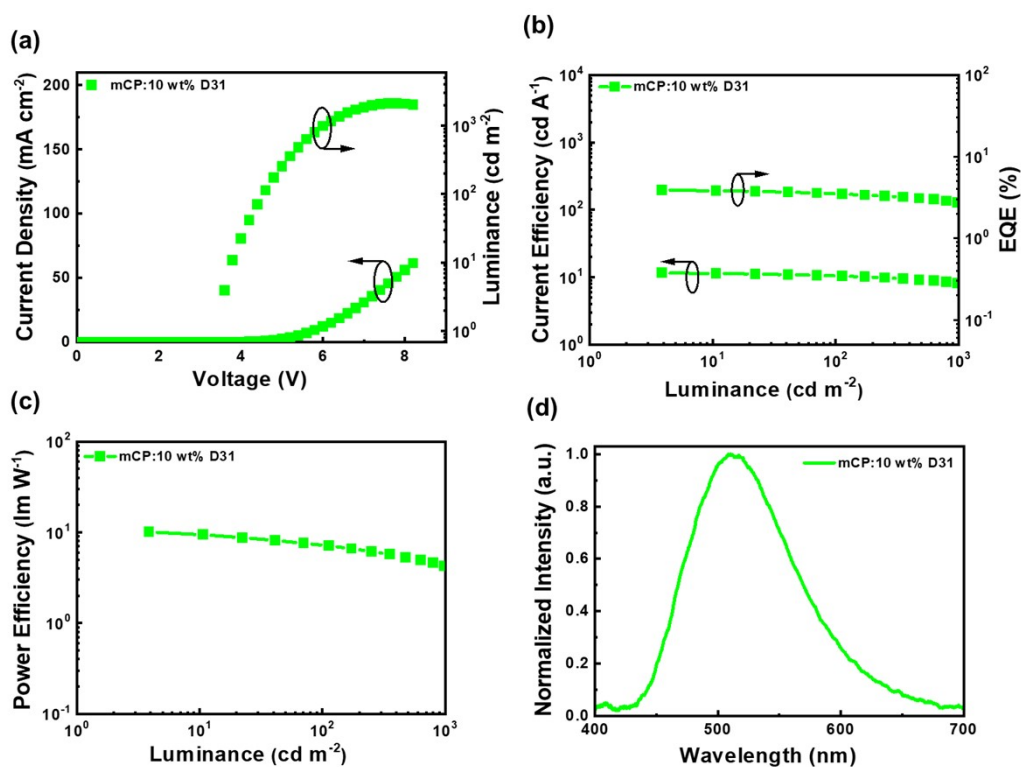

**Fig. S26.** Doped device performances of 10 wt% D31 in mCP: (a) Current density-luminance-voltage characteristics; (b) Current efficiency-luminance-EQE properties; (c) Power efficiency *versus* luminance curves; (d) EL spectrum.

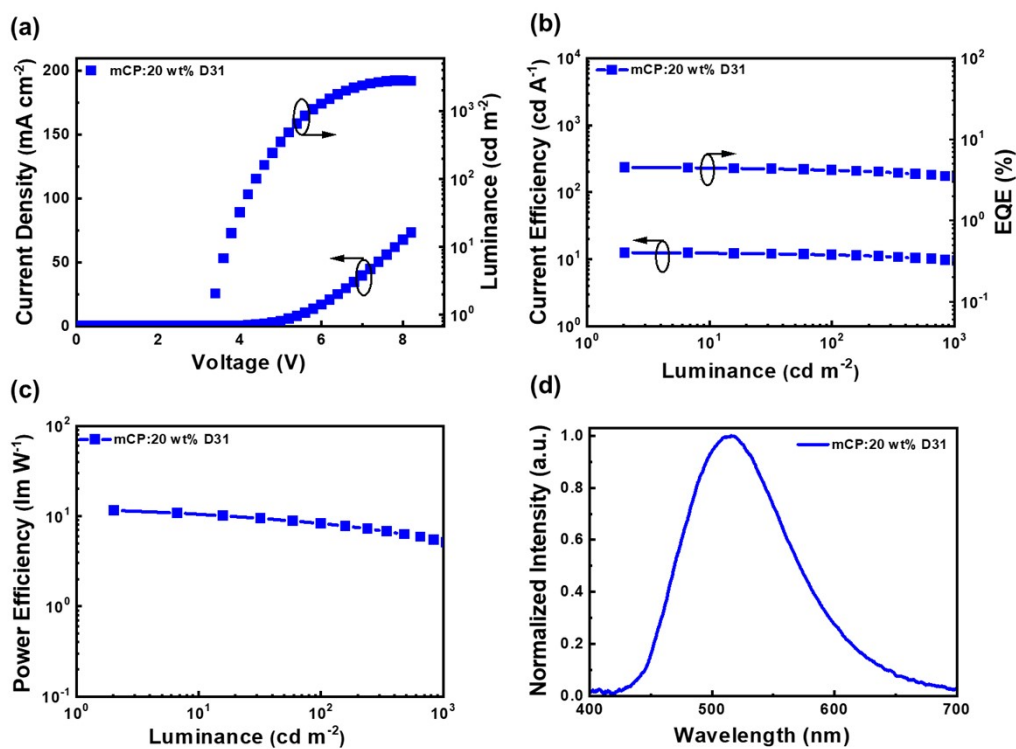

**Fig. S27.** Doped device performances of 20 wt% D31 in mCP: (a) Current density-luminance-voltage characteristics; (b) Current efficiency-luminance-EQE properties; (c) Power efficiency *versus* luminance curves; (d) EL spectrum.

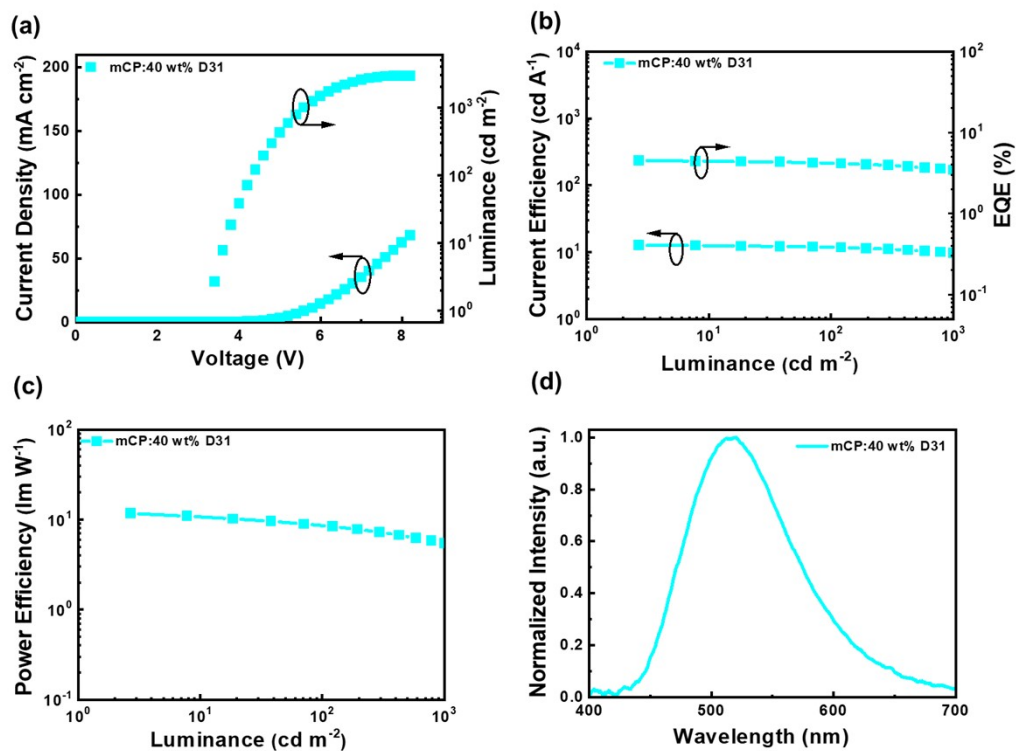

**Fig. S28.** Doped device performances of 40 wt% D31 in mCP: (a) Current density-luminance-voltage characteristics; (b) Current efficiency-luminance-EQE properties; (c) Power efficiency *versus* luminance curves; (d) EL spectrum.

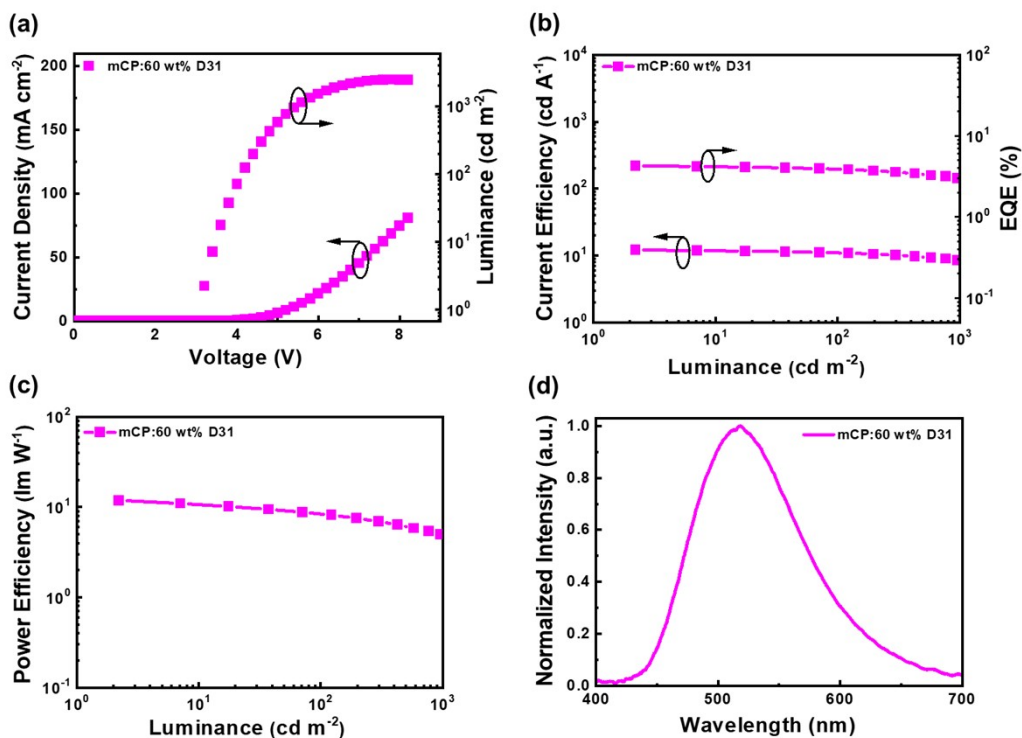

**Fig. S29.** Doped device performances of 60 wt% D31 in mCP: (a) Current density-luminance-voltage characteristics; (b) Current efficiency-luminance-EQE properties; (c) Power efficiency *versus* luminance curves; (d) EL spectrum.

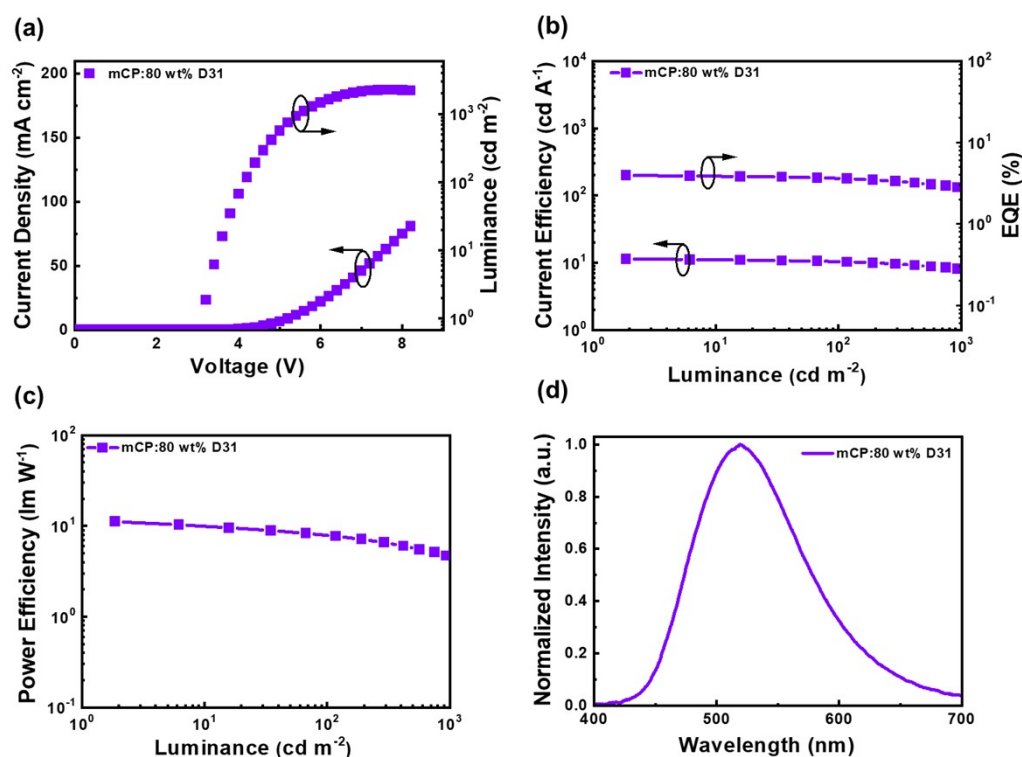

**Fig. S30.** Doped device performances of 80 wt% D31 in mCP: (a) Current density-luminance-voltage characteristics; (b) Current efficiency-luminance-EQE properties; (c) Power efficiency *versus* luminance curves; (d) EL spectrum.

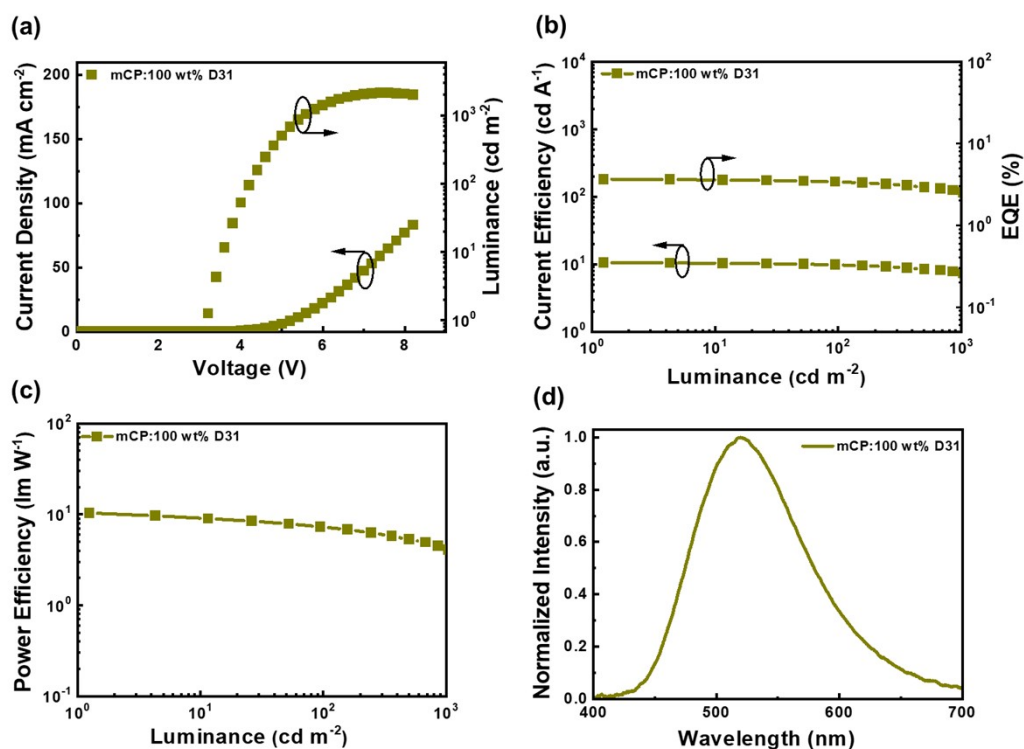

**Fig. S31.** Non-doped device performances of D31: (a) Current density-luminance-voltage characteristics; (b) Current efficiency-luminance-EQE properties; (c) Power efficiency *versus* luminance curves; (d) EL spectrum.

**Table S8.** Key EL data of doped and non-doped OLED performances of D31.

| EML           | $V_{on}^a$ | $L^b$            | $CE^c$           | $PE^c$           | $EQE^c$   | $CIE^d$   |
|---------------|------------|------------------|------------------|------------------|-----------|-----------|
|               | (V)        | ( $cd\ m^{-2}$ ) | ( $cd\ A^{-1}$ ) | ( $lm\ W^{-1}$ ) | (%)       | (x,y)     |
| mCP:5wt% D31  | 3.5        | 1650             | 10.56/6.15       | 9.21/3.12        | 3.94/2.29 | 0.26,0.47 |
| mCP:10wt% D31 | 3.5        | 2106             | 11.56/7.68       | 10.09/3.89       | 3.90/2.60 | 0.27,0.48 |
| mCP:20wt% D31 | 3.5        | 2795             | 12.51/9.43       | 11.56/5.11       | 4.51/3.40 | 0.27,0.48 |
| mCP:40wt% D31 | 3.4        | 2926             | 12.69/9.69       | 11.72/5.44       | 4.51/3.44 | 0.28,0.49 |
| mCP:60wt% D31 | 3.2        | 2468             | 12.10/8.00       | 11.88/4.49       | 4.28/2.83 | 0.28,0.49 |
| mCP:80wt% D31 | 3.2        | 2280             | 11.37/7.56       | 11.16/4.24       | 3.94/2.63 | 0.29,0.50 |
| D31           | 3.2        | 2128             | 10.55/7.27       | 10.36/4.08       | 3.66/2.52 | 0.29,0.50 |

<sup>a</sup>Turn-on voltage at 1  $cd\ m^{-2}$ . <sup>b</sup>Maximum luminance. <sup>c</sup>Data at maximum and 1000  $cd\ m^{-2}$ . <sup>d</sup>Data at a driving voltage of 6 V.

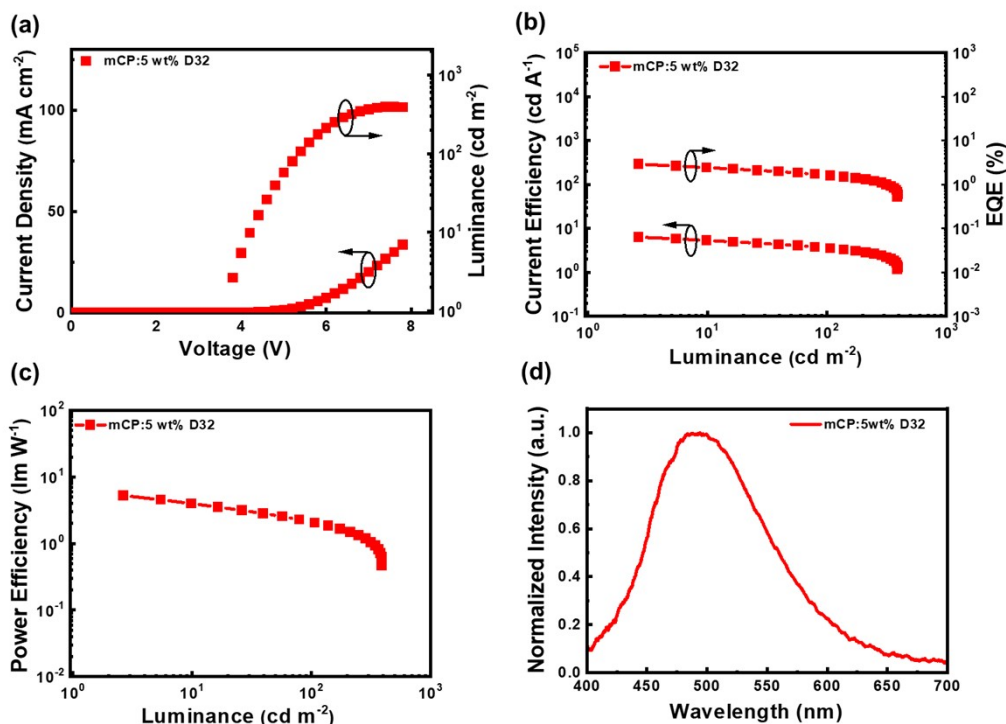

**Fig. S32.** Doped device performances of 5 wt% D32 in mCP: (a) Current density-luminance-voltage characteristics; (b) Current efficiency-luminance-EQE properties; (c) Power efficiency *versus* luminance curves; (d) EL spectrum.

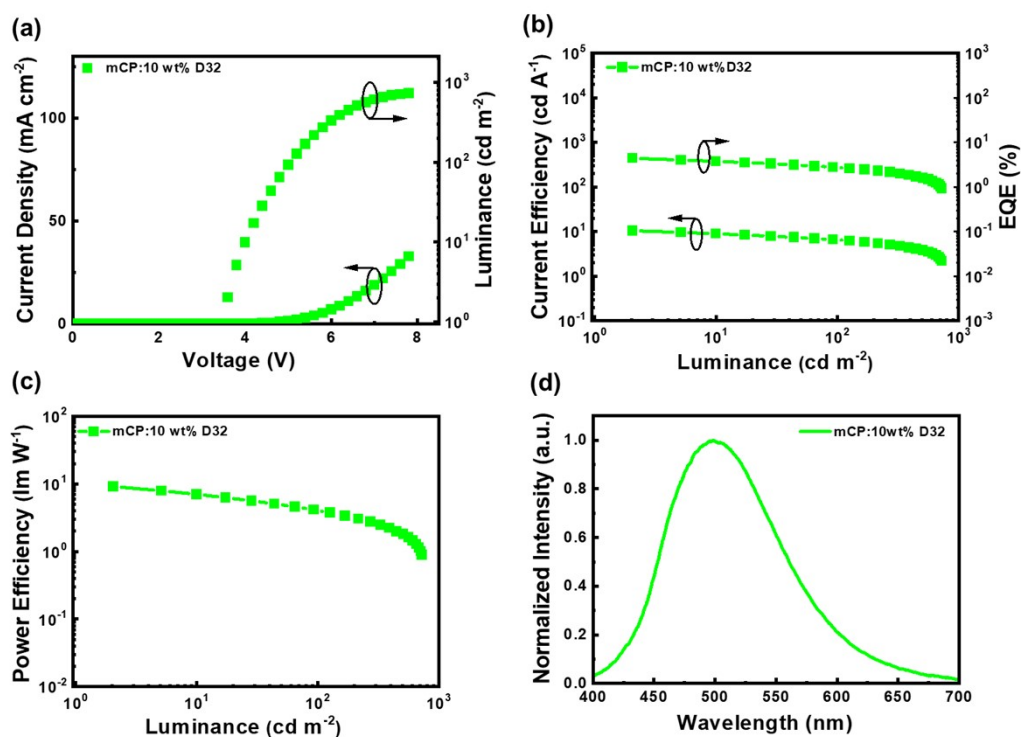

**Fig. S33.** Doped device performances of 10 wt% D32 in mCP: (a) Current density-luminance-voltage characteristics; (b) Current efficiency-luminance-EQE properties; (c) Power efficiency *versus* luminance curves; (d) EL spectrum.

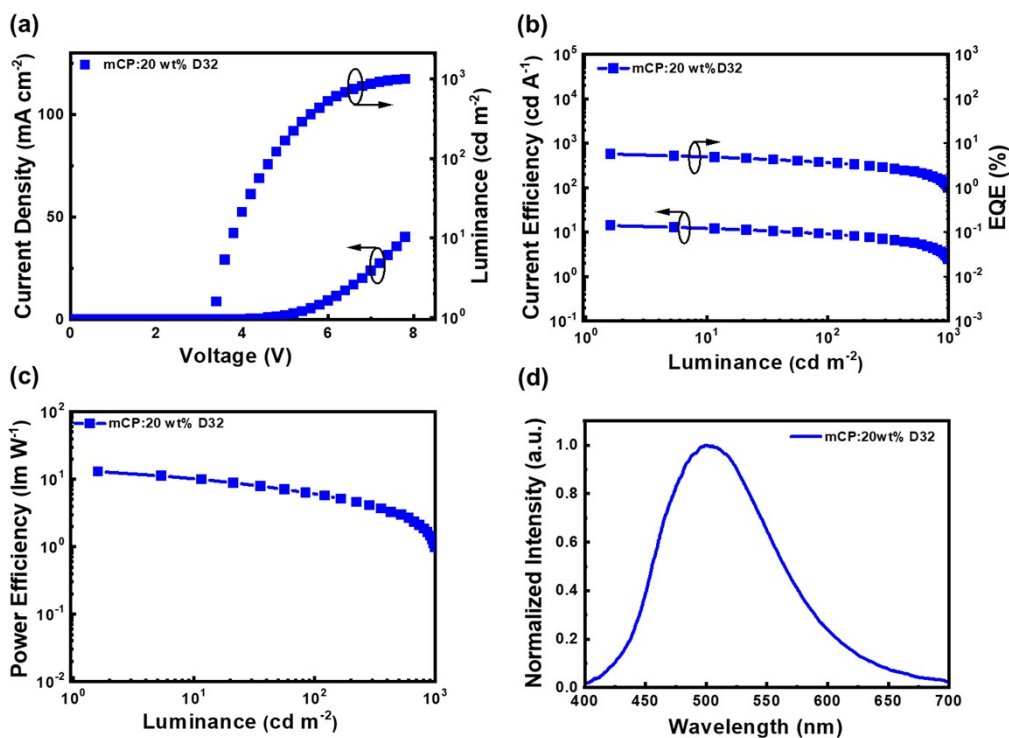

**Fig. S34.** Doped device performances of 20 wt% D32 in mCP: (a) Current density-luminance-voltage characteristics; (b) Current efficiency-luminance-EQE properties; (c) Power efficiency *versus* luminance curves; (d) EL spectrum.

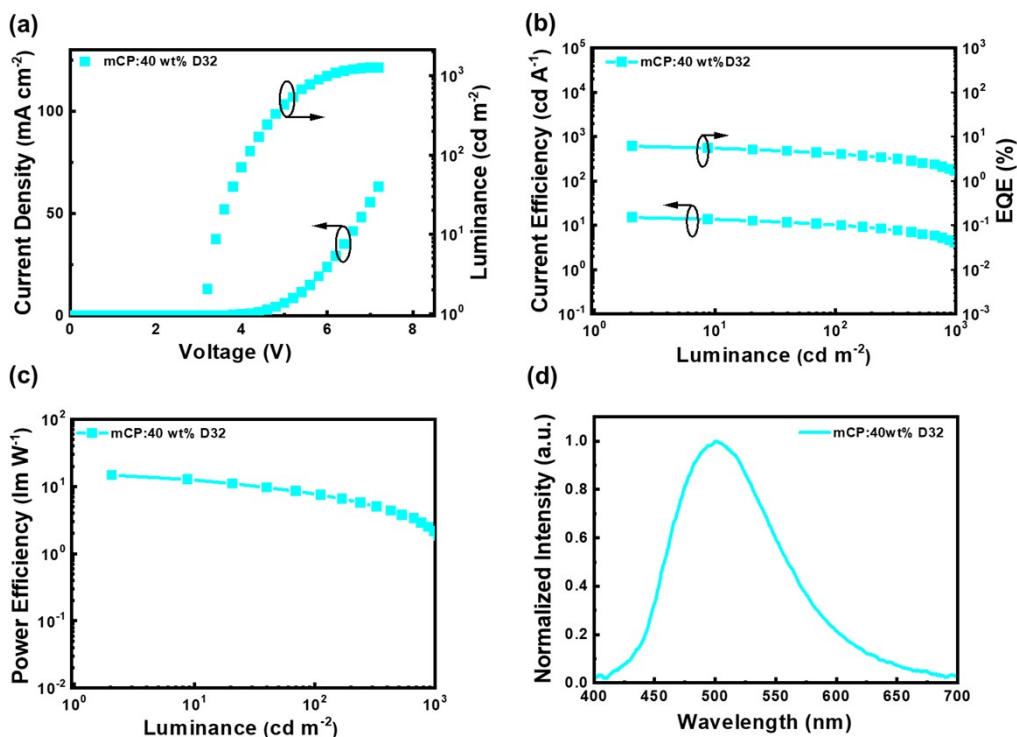

**Fig. S35.** Doped device performances of 40 wt% D32 in mCP: (a) Current density-luminance-voltage characteristics; (b) Current efficiency-luminance-EQE properties; (c) Power efficiency *versus* luminance curves; (d) EL spectrum.



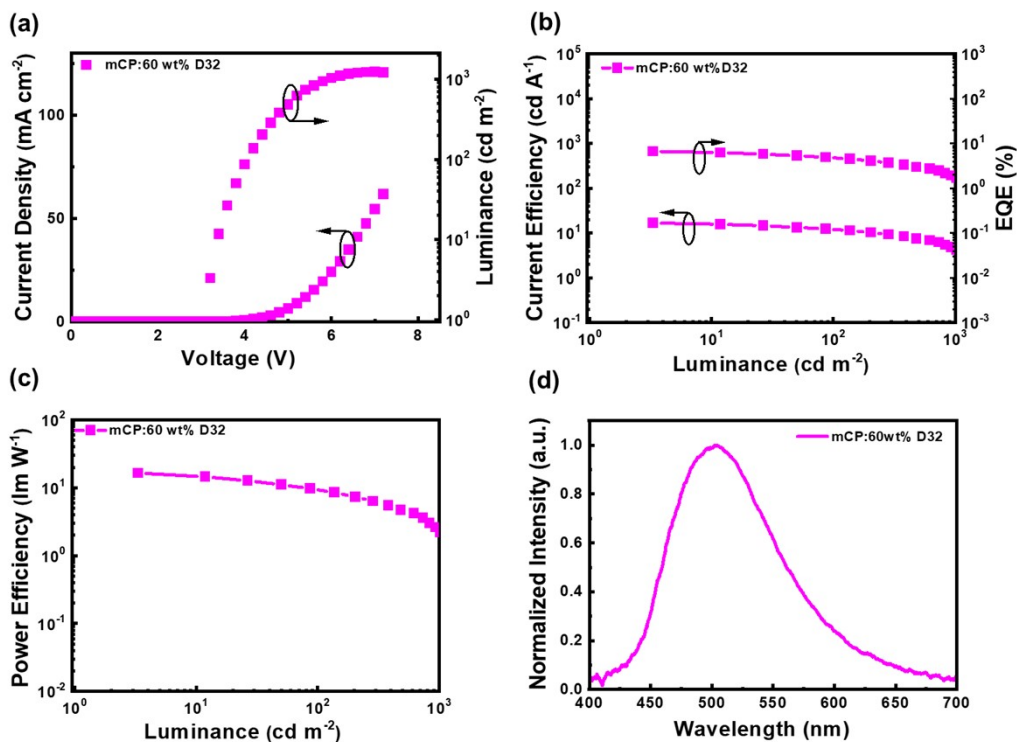

**Fig. S36.** Doped device performances of 60 wt% D32 in mCP: (a) Current density-luminance-voltage characteristics; (b) Current efficiency-luminance-EQE properties; (c) Power efficiency *versus* luminance curves; (d) EL spectrum.

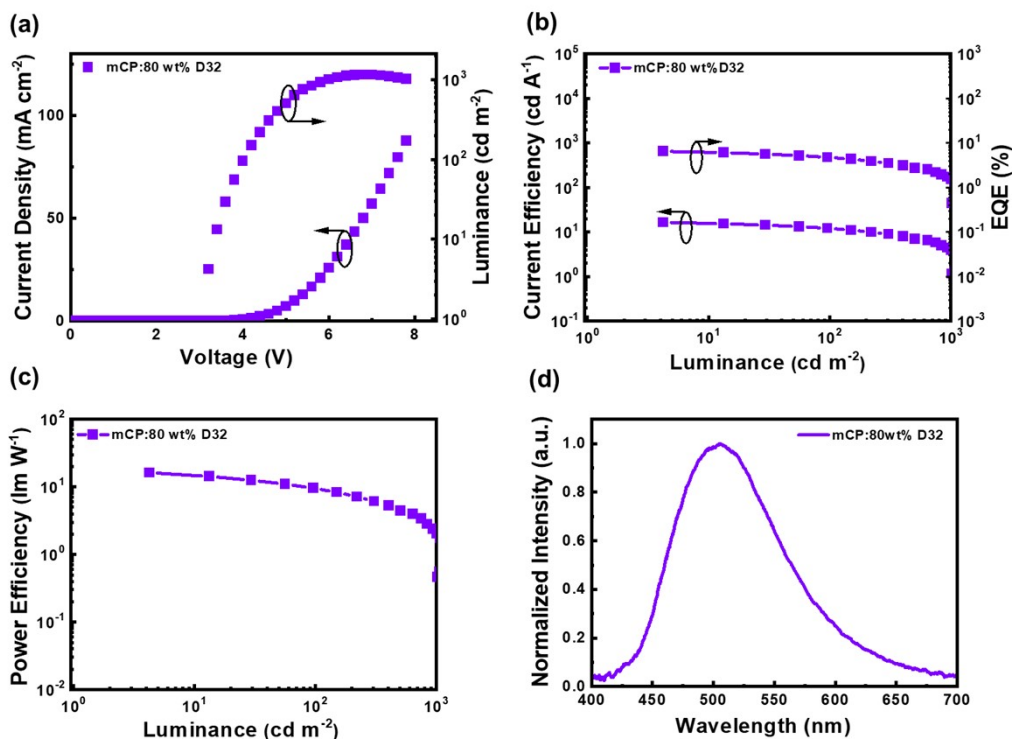

**Fig. S37.** Doped device performances of 80 wt% D32 in mCP: (a) Current density-luminance-voltage characteristics; (b) Current efficiency-luminance-EQE properties; (c) Power efficiency *versus* luminance curves; (d) EL spectrum.

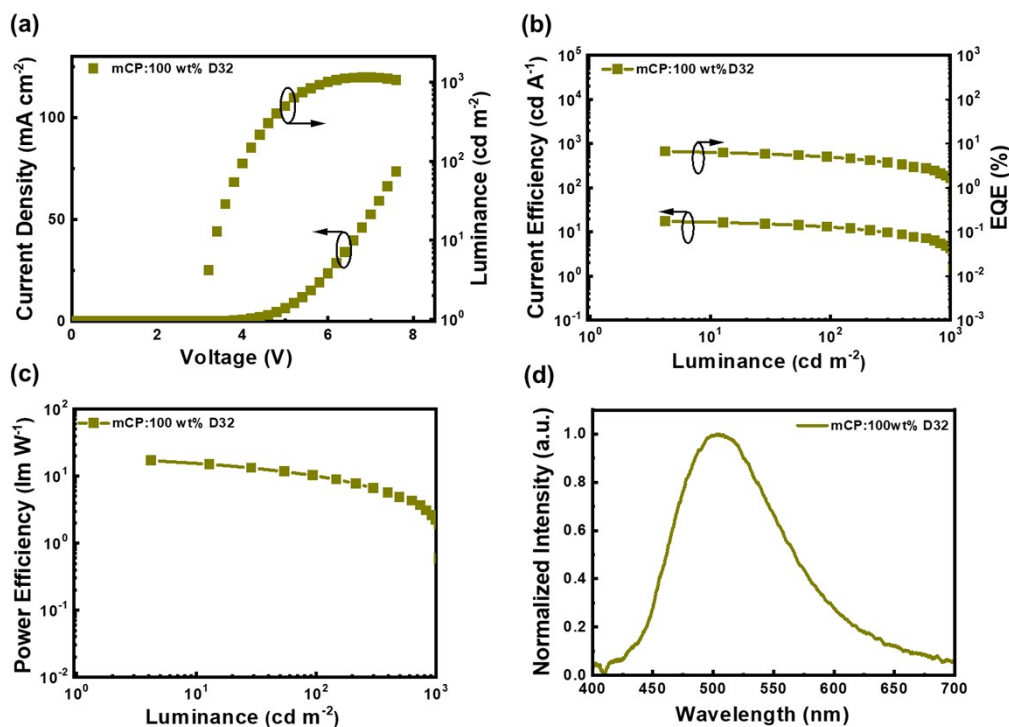

**Fig. S38.** Non-doped device performances of D32: (a) Current density-luminance-voltage characteristics; (b) Current efficiency-luminance-EQE properties; (c) Power efficiency *versus* luminance curves; (d) EL spectrum.

**Table S9.** Key EL data of doped and non-doped OLED performances of D32.

| EML           | $V_{on}^a$<br>(V) | $L^b$<br>( $cd\ m^{-2}$ ) | $CE^c$<br>( $cd\ A^{-1}$ ) | $PE^c$<br>( $lm\ W^{-1}$ ) | $EQE^c$<br>(%) | $CIE^d$<br>(x,y) |
|---------------|-------------------|---------------------------|----------------------------|----------------------------|----------------|------------------|
| mCP:5wt% D32  | 3.8               | 392                       | 6.37/-                     | 5.27/-                     | 2.91/-         | 0.22,0.36        |
| mCP:10wt% D32 | 3.6               | 728                       | 10.52/-                    | 9.18/-                     | 4.44/-         | 0.23,0.39        |
| mCP:20wt% D32 | 3.4               | 993                       | 14.10/-                    | 13.03/-                    | 5.73/-         | 0.24,0.41        |
| mCP:40wt% D32 | 3.2               | 1247                      | 15.07/3.67                 | 14.80/1.86                 | 6.10/1.49      | 0.24,0.42        |
| mCP:60wt% D32 | 3.2               | 1221                      | 16.84/4.25                 | 16.54/2.23                 | 6.70/1.69      | 0.24,0.43        |
| mCP:80wt% D32 | 3.2               | 1151                      | 16.52/3.91                 | 16.22/2.05                 | 6.50/1.52      | 0.24,0.44        |
| D32           | 3.2               | 1144                      | 17.39/4.25                 | 17.07/2.23                 | 6.69/1.64      | 0.25,0.44        |

<sup>a</sup>Turn-on voltage at  $1\ cd\ m^{-2}$ . <sup>b</sup>Maximum luminance. <sup>c</sup>Data at maximum and  $1000\ cd\ m^{-2}$ . <sup>d</sup>Data at a driving voltage of 6 V.



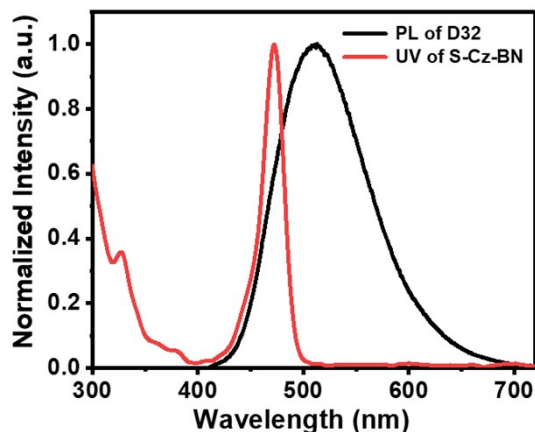

**Fig. S39.** Overlap between the absorption of S-Cz--BN and the PL of D32.

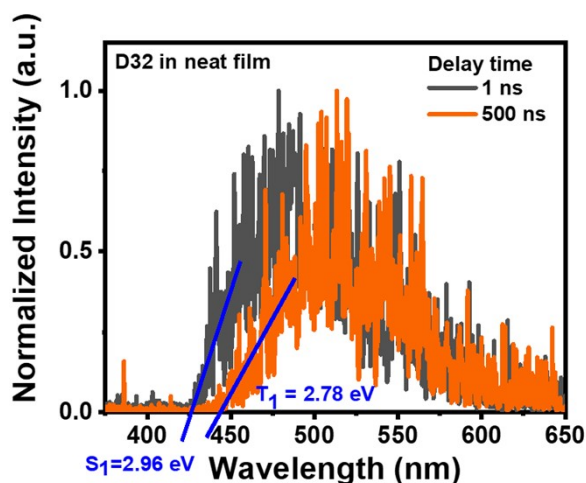

**Fig. S40.** Determination of the energy levels of  $S_1$  and  $T_1$  for D32. Based on the TRES analysis, it is observed that fluorescence and phosphorescence are the predominant processes in the PL emission at delay times of 1 ns and 500 ns, respectively. Therefore, their onset values can be reasonably considered as the  $S_1$  and  $T_1$  energies of D32. As a result, the energy levels of  $S_1$  and  $T_1$  for D32 are calculated to be 2.96 and 2.78 eV, respectively, using the equation  $E = 1240/\lambda_{\text{onset}}$ , where their onset values are determined to be 419 and 446 nm, respectively.

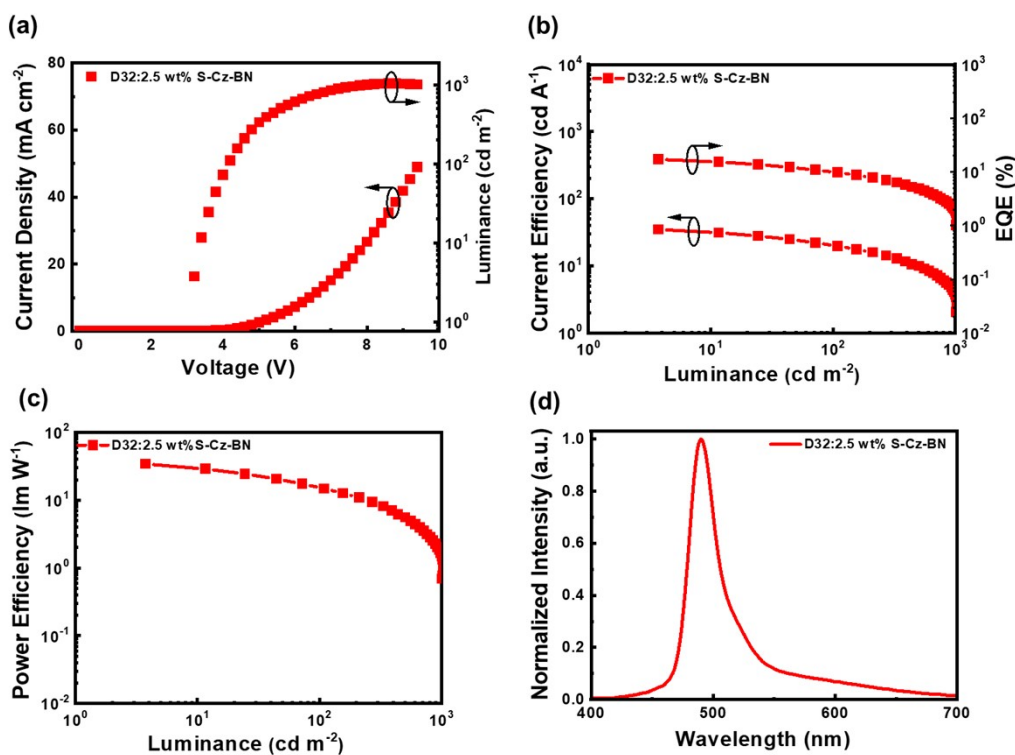

**Fig. S41.** The sensitization device of D32:2.5 wt% S-Cz-BN: (a) Current density-luminance-voltage characteristics; (b) Current efficiency-luminance-EQE properties; (c) Power efficiency *versus* luminance curves; (d) EL spectrum.

## 5. Reference

- [1] L. Xu, Y. Mo, N. Su, C. Shi, N. Sun, Y. Zhang, L. Duan, Z. -H. Lu, J. Ding. D-O-A based organic phosphors for both aggregation-induced electrophosphorescence and host-free sensitization, *Nat. Commun.* 2023, 14, 1678.
